# Supplementary material
Source: Royal Society of Chemistry journal article supplement (doi:10.1039/d6dt00703a)
Supplement: d6dt00703a1.pdf [file d6dt00703a1.pdf]

## Pd(II) Complexes of *Meso*-Tetraaryl Triphyrin(2.1.1)s: Synthesis and Studies

Gayathri Sekar, Akrti Sharma and Mangalampalli Ravikanth\*

Department of Chemistry, Indian Institute of Technology Bombay, Powai, Mumbai 400076,  
India, E-mail: [ravikanth@chem.iitb.ac.in](mailto:ravikanth@chem.iitb.ac.in)

| Sr.no | Details                                                                                                                                                     | Page no. |
|-------|-------------------------------------------------------------------------------------------------------------------------------------------------------------|----------|
| 1.    | General experimental, and Computational details                                                                                                             | S2-S3    |
| 2     | Figures S1-S12: HRMS, $^1\text{H}$ , and $^{13}\text{C}\{^1\text{H}\}$ NMR data for all compounds <b>1c</b> and <b>1a.Pd(II)</b> – <b>1c.Pd(II)</b> .       | S4-S15   |
| 3     | Figure S13-14: $^1\text{H}$ - $^1\text{H}$ COSY and NOSEY of compound <b>1c.Pd(II)</b> .                                                                    | S16-S17  |
| 4     | Table S1-S3 and Figures S15: X-ray crystal structure and data for compounds <b>1b.Pd(II)</b> .                                                              | S18-S21  |
| 5     | Figure S16: Absorption spectra for the compounds <b>1a.Pd(II)</b> – <b>1c.Pd(II)</b> .                                                                      | S22      |
| 6     | Figure S17: Electrochemical data for the compounds <b>1a.Pd(II)</b> – <b>1c.Pd(II)</b> .                                                                    | S23      |
| 7     | Figure S18: Calculated excitations and experimental absorption spectrum for compounds <b>1a.Pd(II)</b> – <b>1c.Pd(II)</b> .                                 | S24      |
| 8     | Tables S4-S6: Cartesian coordinate for the optimized geometry of compounds <b>1a.Pd(II)</b> – <b>1c.Pd(II)</b> .                                            | S25-S30  |
| 9     | Tables S7-S9: Selected TD-DFT calculated oscillator strengths and compositions of the major electronic transitions of <b>1a.Pd(II)</b> – <b>1c.Pd(II)</b> . | S31-S36  |
| 10    | References                                                                                                                                                  | S37      |

## General Experimental section

**Materials and Methods.** All chemicals and reagents were purchased from Sigma-Aldrich or Merck and used as received without further purification in analytical grade. The required *meso*-tetra(aryl) triphyrin(2.1.1)<sup>1</sup> derivatives **1a–1c** were synthesized following our recently reported procedure. Column chromatography was carried out using basic alumina and silica gel (60–120 mesh). The <sup>1</sup>H, <sup>13</sup>C, and 2D NMR spectra ( $\delta$  in ppm) were recorded on 400 and 500 MHz Bruker spectrometers using CDCl<sub>3</sub> as the deuterated solvent. The operating frequencies for <sup>13</sup>C nuclei were 100.06 MHz and 125.77 MHz for the 400 and 500 MHz instruments, respectively. Tetramethylsilane (TMS, Si(CH<sub>3</sub>)<sub>4</sub>) was used as the internal standard for both <sup>1</sup>H and <sup>13</sup>C{<sup>1</sup>H} NMR measurements. Structural assignments were further supported by 2D NMR experiments, including COSY and NOESY, particularly for complex **1c.Pd(II)**. UV–Vis–NIR absorption spectra were recorded on a Cary series spectrophotometer. Stock solutions for UV–Vis measurements (10<sup>-5</sup> M) were prepared in HPLC-grade chloroform. Electrochemical measurements were performed in dry dichloromethane containing 0.1 M tetrabutylammonium perchlorate (TBAP) as the supporting electrolyte. Cyclic voltammetry experiments were conducted using a BAS electrochemical workstation equipped with a glassy carbon working electrode, a platinum wire counter electrode, and a saturated calomel reference electrode (SCE). Half-wave potentials were determined from differential pulse voltammetry (DPV) as well as by averaging the anodic and cathodic peak potentials. High-resolution mass spectra were recorded using a Q-TOF micro mass spectrometer.

**X-ray crystal structure analysis.** Single brown-colored crystals of **1b.Pd(II)** were obtained as supplied. A suitable crystal was selected and mounted on a Bruker APEX-II CCD diffractometer. Diffraction data were collected at 150 K using graphite-monochromated Cu

K $\alpha$  radiation ( $\lambda = 1.54184 \text{ \AA}$ ) employing the  $\omega$ -scan technique. The crystal temperature was maintained at a constant 150.15 K throughout the data collection. The structure was solved using the dual-space method with the solve program implemented in the Olex2 (v1.5) package, which was also used as the graphical interface. The structural model was refined using refine within Olex2 through full-matrix least-squares minimization on  $F^2$ .<sup>2,3</sup> Crystallographic data for compound **1b.Pd(II)** have been deposited with the Cambridge Crystallographic Data Centre (CCDC No. 2536465) and can be obtained free of charge from the CCDC.

**Computational Details.** For all the calculations Gaussian 16 program package was used.<sup>4</sup> The density functional theory (DFT) method with the B3LYP/6-31G(d,p) and LANL2DZ basis set was used to optimize the structures of **1a.Pd(II)**-**1c.Pd(II)** in  $S_0$  state.<sup>5-7</sup> All the computations were performed using the self-consistent reaction field (SCRF) under the polarisable continuum model (PCM) in the toluene media. The electronic absorption spectra as well as the oscillator strengths were thoroughly examined using TD-DFT with PCM model based on the optimized structures in the  $S_0$  state.<sup>8</sup>

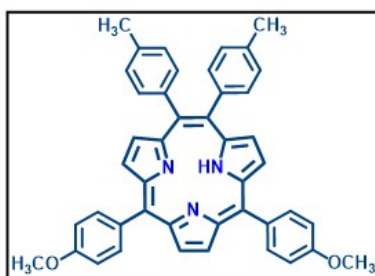

**Compound Details**

Cpd. 1: C<sub>44</sub> H<sub>35</sub> N<sub>3</sub> O<sub>2</sub>

| Formula                                                       | m/z      | Observed M/Z     | Difference Da      | Difference PPM     | Score |
|---------------------------------------------------------------|----------|------------------|--------------------|--------------------|-------|
| C <sub>44</sub> H <sub>35</sub> N <sub>3</sub> O <sub>2</sub> | 638.2797 | 638.279744255072 | -0.159890412191999 | -0.250897857607922 | 98.15 |

**Compound Spectra (Zoomed)**

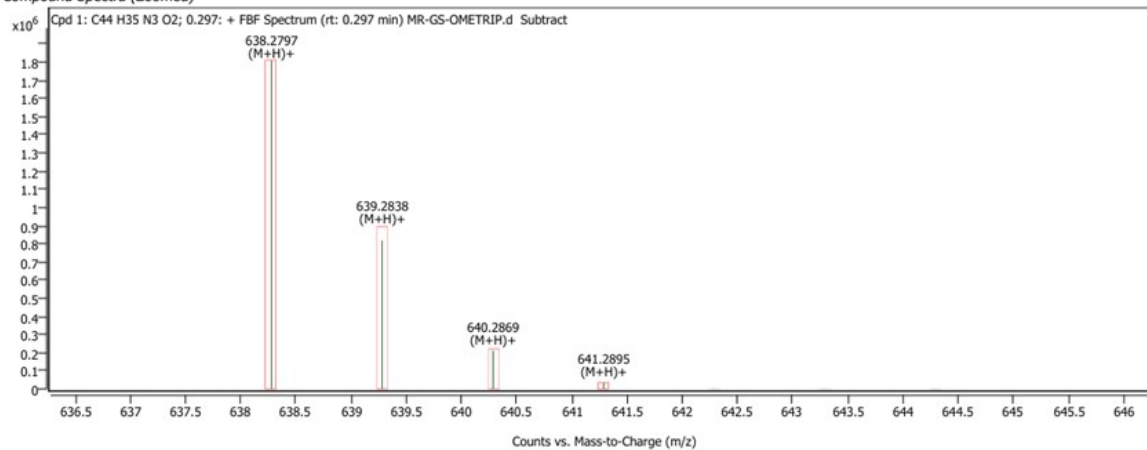

MassHunter Qual 10.0  
(End of Report)

**Figure S1.** HR mass spectrum of the compound **1c**

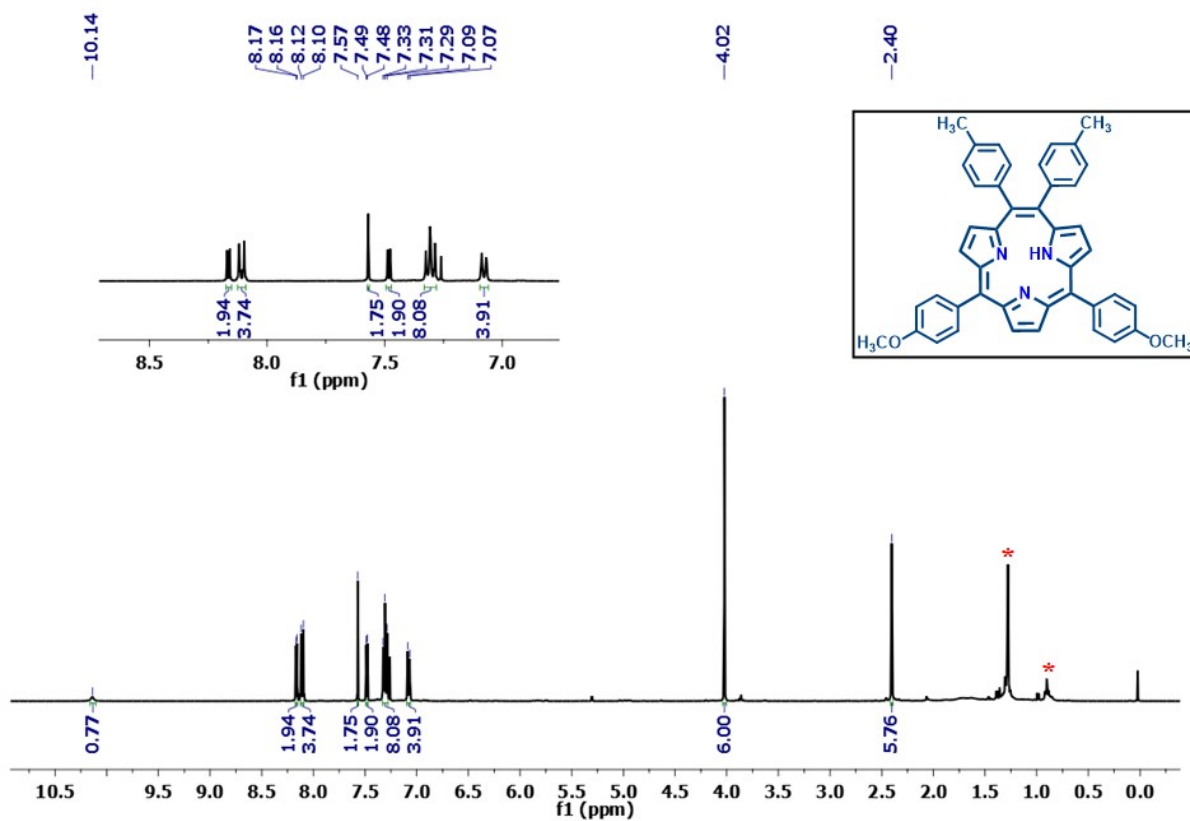

**Figure S2.** <sup>1</sup>H NMR spectrum of the compound **1c** recorded in CDCl<sub>3</sub> on 400 MHz NMR instrument. Note: Peaks marked with asterisk (\*) are due to residual solvents.

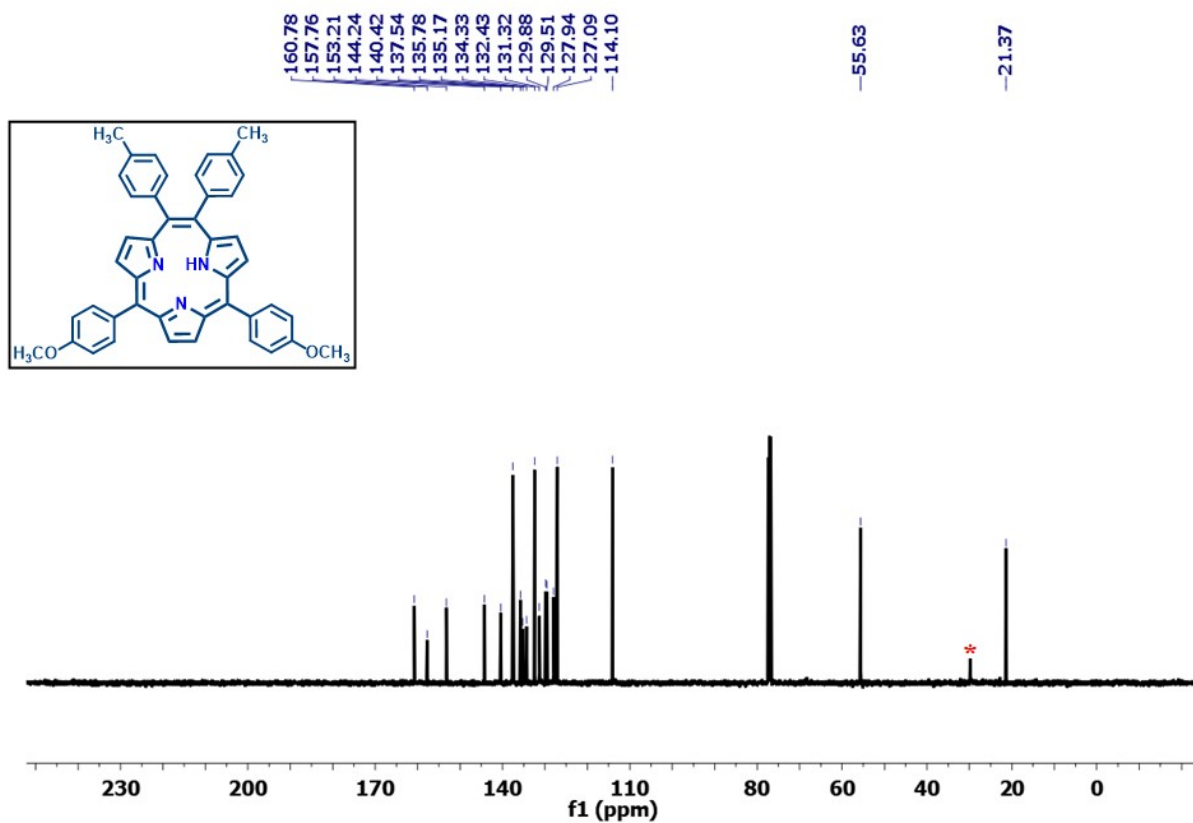

**Figure S3.**  $^{13}\text{C}\{^1\text{H}\}$  NMR spectrum of the compound **1c** recorded in  $\text{CDCl}_3$  on 400 MHz NMR instrument. Note: Peaks marked with asterisk (\*) are due to residual solvents.

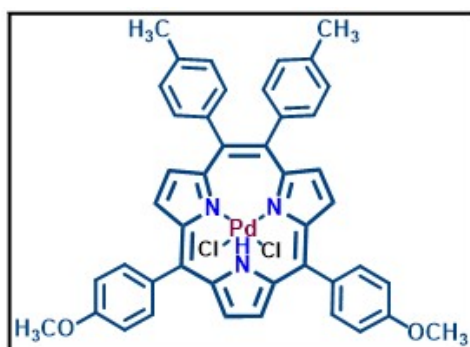

#### Compound Details

Cpd. 1: C<sub>44</sub> H<sub>35</sub> Cl<sub>2</sub> N<sub>3</sub> O<sub>2</sub> Pd

| Formula                                                                          | m/z      | Observed M/Z     | Difference Da     | Difference PPM    | Score |
|----------------------------------------------------------------------------------|----------|------------------|-------------------|-------------------|-------|
| C <sub>44</sub> H <sub>35</sub> Cl <sub>2</sub> N <sub>3</sub> O <sub>2</sub> Pd | 819.1733 | 819.173283206022 | 0.595253715459876 | 0.768915229042989 | 94.21 |

#### Compound Spectra (Zoomed)

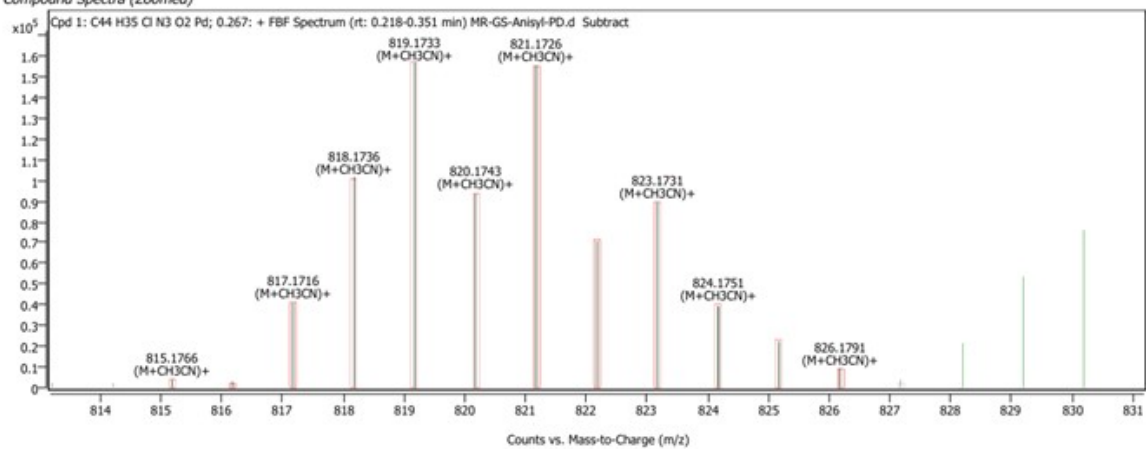

MassHunter Qual 10.0  
(End of Report)

Figure S4. HR mass spectrum of the compound 1c.Pd(II)

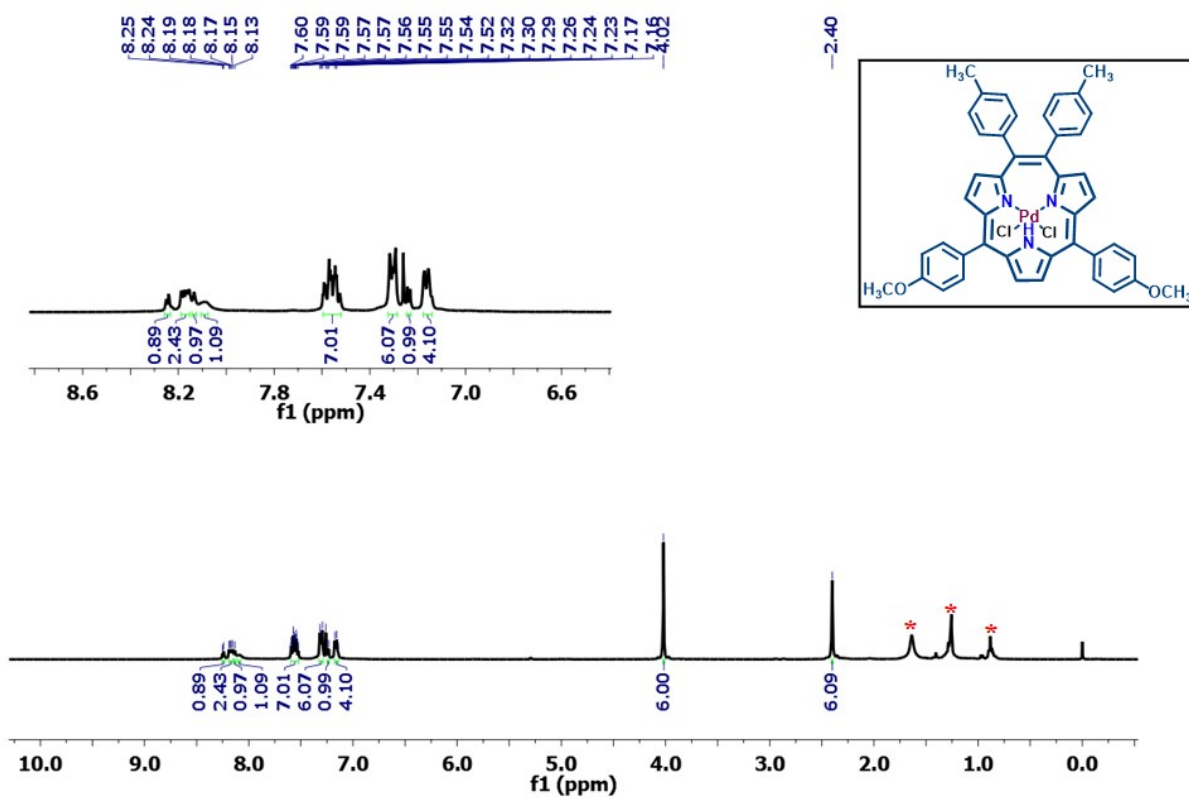

**Figure S5.**  $^1\text{H}$  NMR spectrum of the compound **1c.Pd(II)** recorded in  $\text{CDCl}_3$  on 400 MHz NMR instrument. Note: Peaks marked with asterisk (\*) are due to residual solvents.

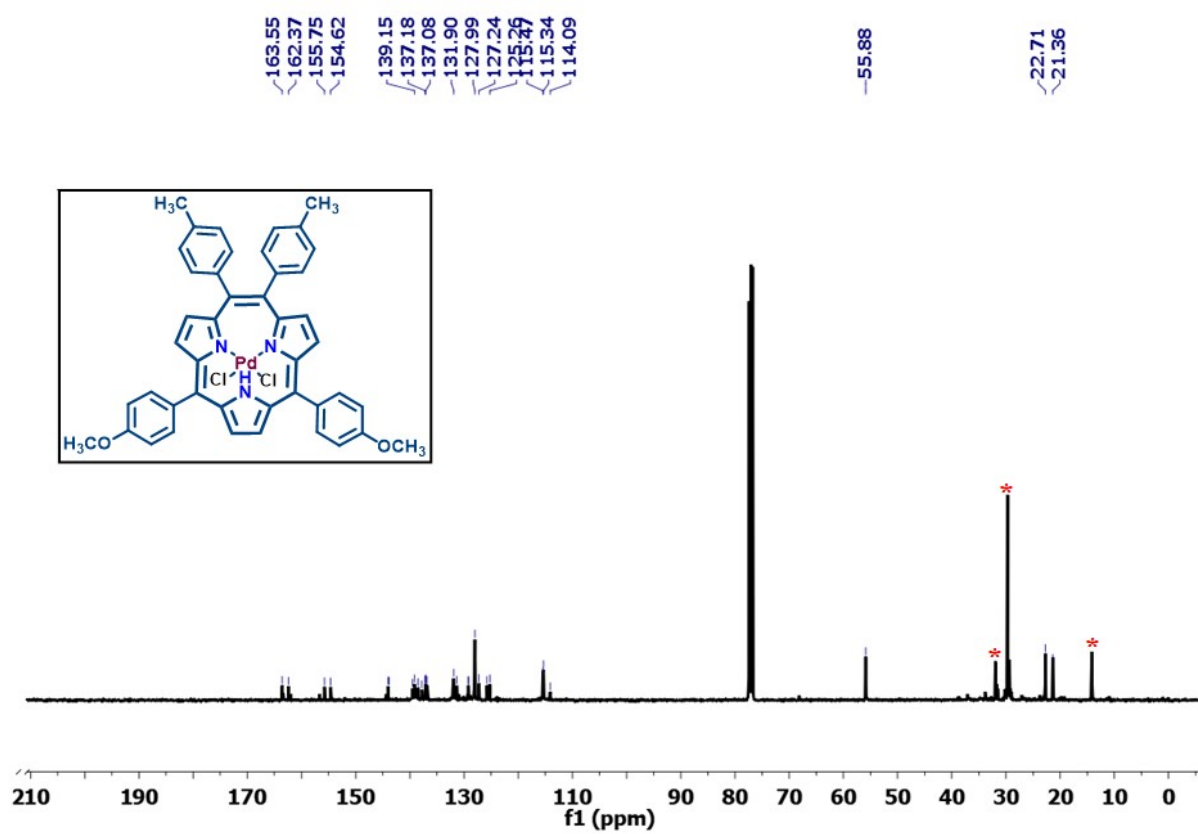

**Figure S6.**  $^{13}\text{C}\{^1\text{H}\}$  NMR spectrum of the compound **1c.Pd(II)** recorded in  $\text{CDCl}_3$  on 400 MHz NMR instrument. Note: Peaks marked with asterisk (\*) are due to residual solvents

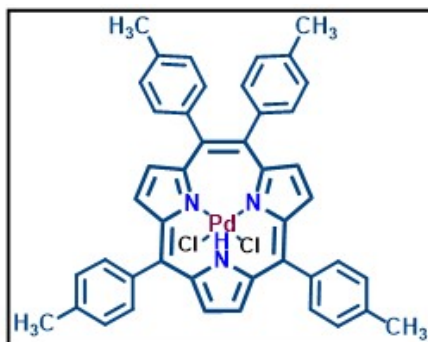

**Compound Details**

Cpd. 1: C<sub>44</sub>H<sub>35</sub>Cl<sub>2</sub>N<sub>3</sub>Pd

| Formula                                                           | m/z      | Observed M/Z     | Difference Da   | Difference PPM   | Score |
|-------------------------------------------------------------------|----------|------------------|-----------------|------------------|-------|
| C <sub>44</sub> H <sub>35</sub> Cl <sub>2</sub> N <sub>3</sub> Pd | 787.1841 | 787.184105733664 | 1.1528650627497 | 1.55339664813428 | 91.73 |

*Compound Spectra (Zoomed)*

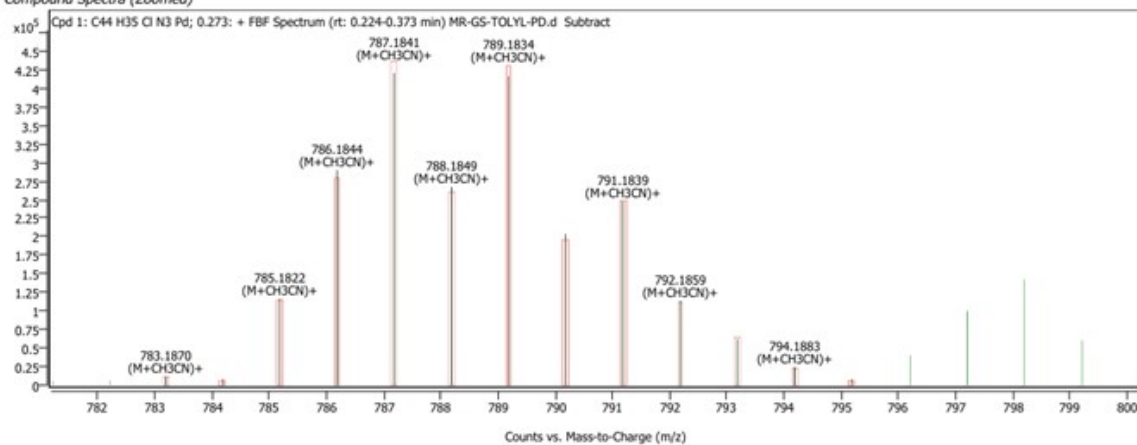

MassHunter Qual 10.0  
(End of Report)

**Figure S7.** HR mass spectrum of the compound **1b.Pd(II)**

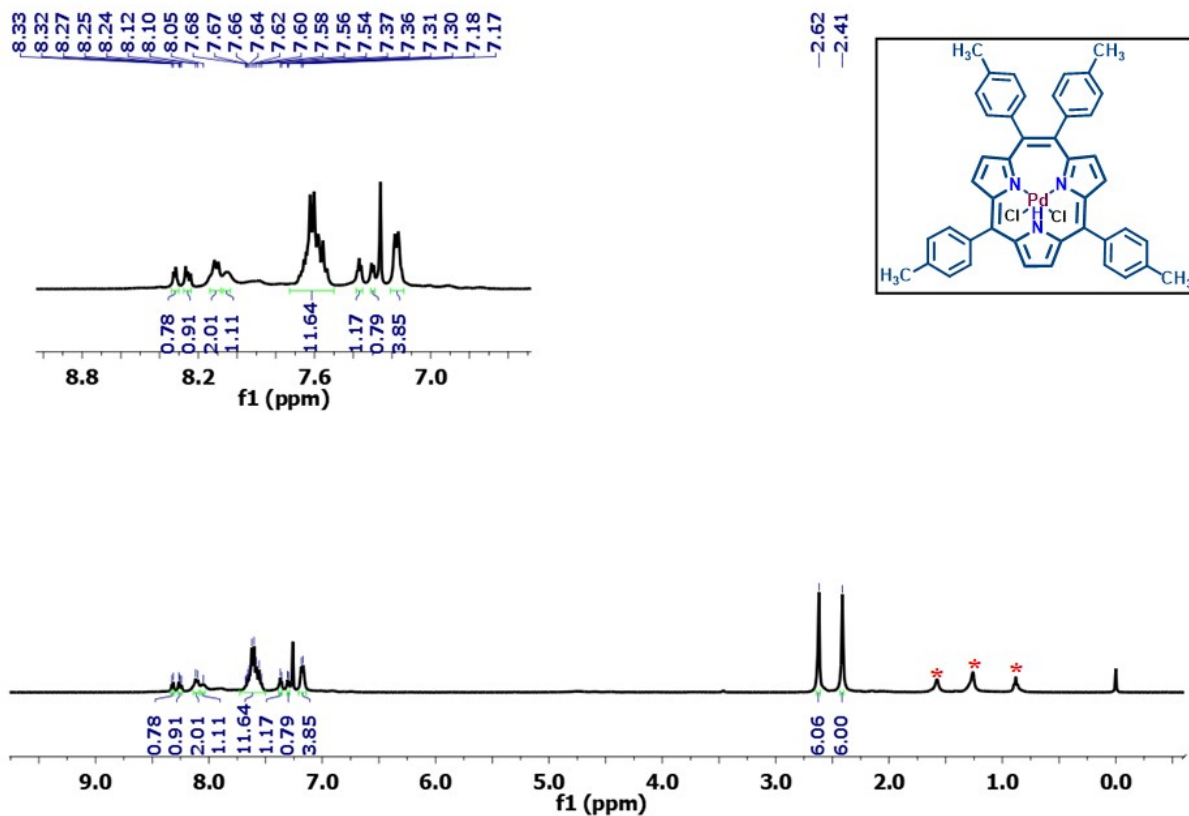

**Figure S8.**  $^1\text{H}$  NMR spectrum of the compound **1b.Pd(II)** recorded in  $\text{CDCl}_3$  on 400 MHz NMR instrument. Note: Peaks marked with asterisk (\*) are due to residual solvents.

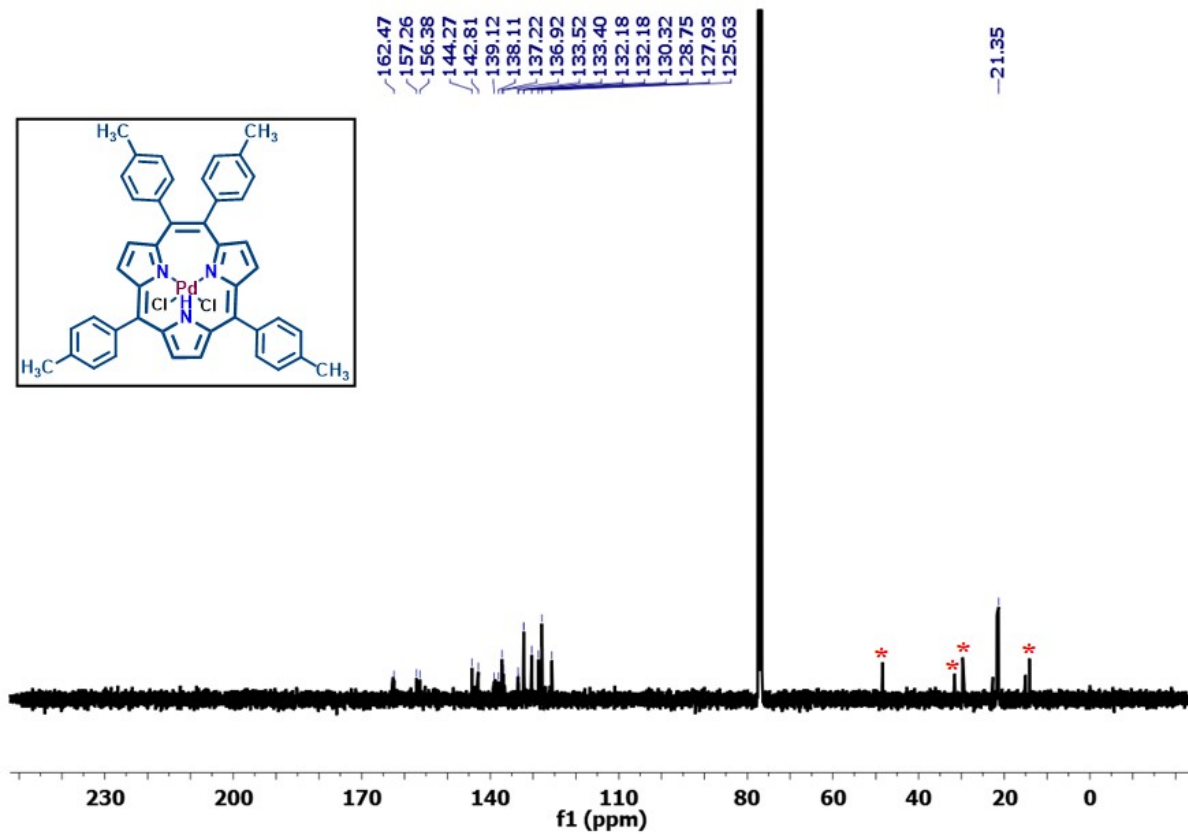

**Figure S9.**  $^{13}\text{C}\{^1\text{H}\}$  NMR spectrum of the compound **1b.Pd(II)** recorded in  $\text{CDCl}_3$  on 400 MHz NMR instrument. Note: Peaks marked with asterisk (\*) are due to residual solvents

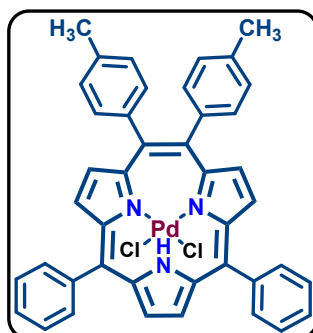

#### Compound Details

Cpd. 1: C42 H31 Cl N3 Pd

| Formula          | m/z      | Observed M/Z     | Difference Da      | Difference PPM     | Score |
|------------------|----------|------------------|--------------------|--------------------|-------|
| C42 H31 Cl N3 Pd | 761.1508 | 761.150793151296 | -0.678555769013656 | -0.950190196309325 | 80.42 |

#### Compound Spectra (Zoomed)

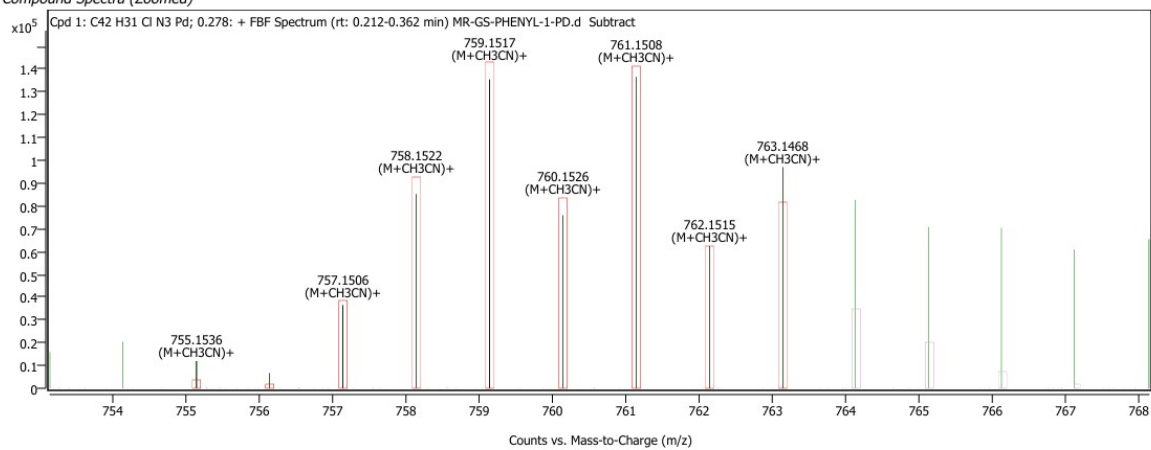

MassHunter Qual 10.0  
(End of Report)

**Figure S10.** HR mass spectrum of the compound **1a.Pd(II)**

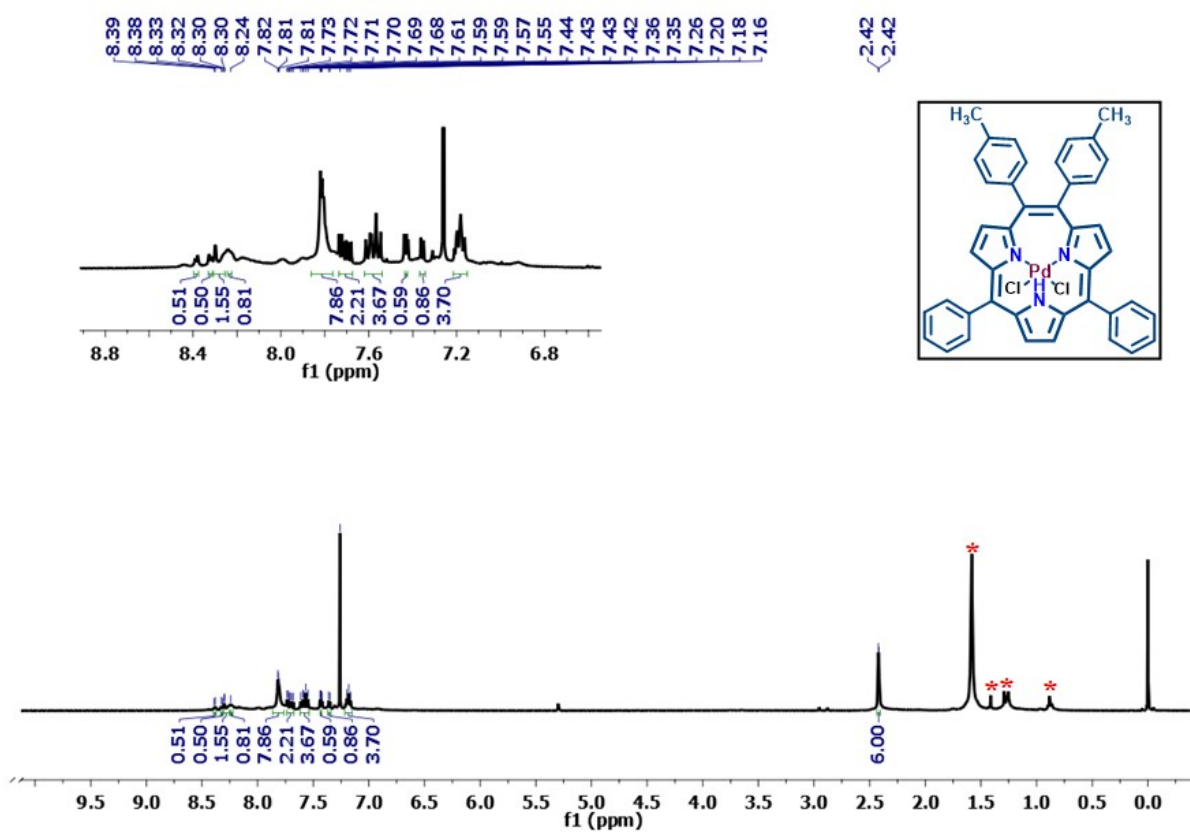

**Figure S11.** <sup>1</sup>H NMR spectrum of the compound **1a.Pd(II)** recorded in CDCl<sub>3</sub> on 400 MHz NMR instrument. Note: Peaks marked with asterisk (\*) are due to residual solvents.

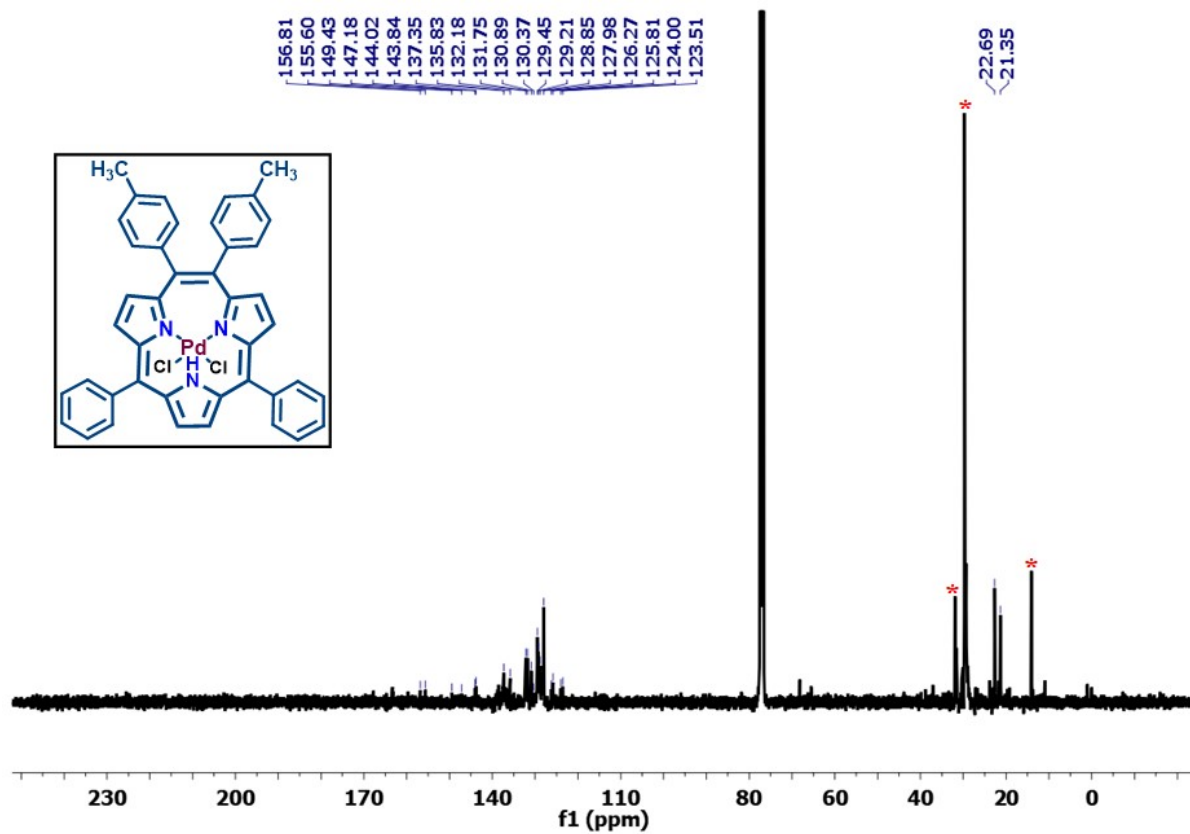

**Figure S12.**  $^{13}\text{C}\{^1\text{H}\}$  NMR spectrum of the compound **1a.Pd(II)** recorded in  $\text{CDCl}_3$  on 400 MHz NMR instrument. Note: Peaks marked with asterisk (\*) are due to residual solvents.

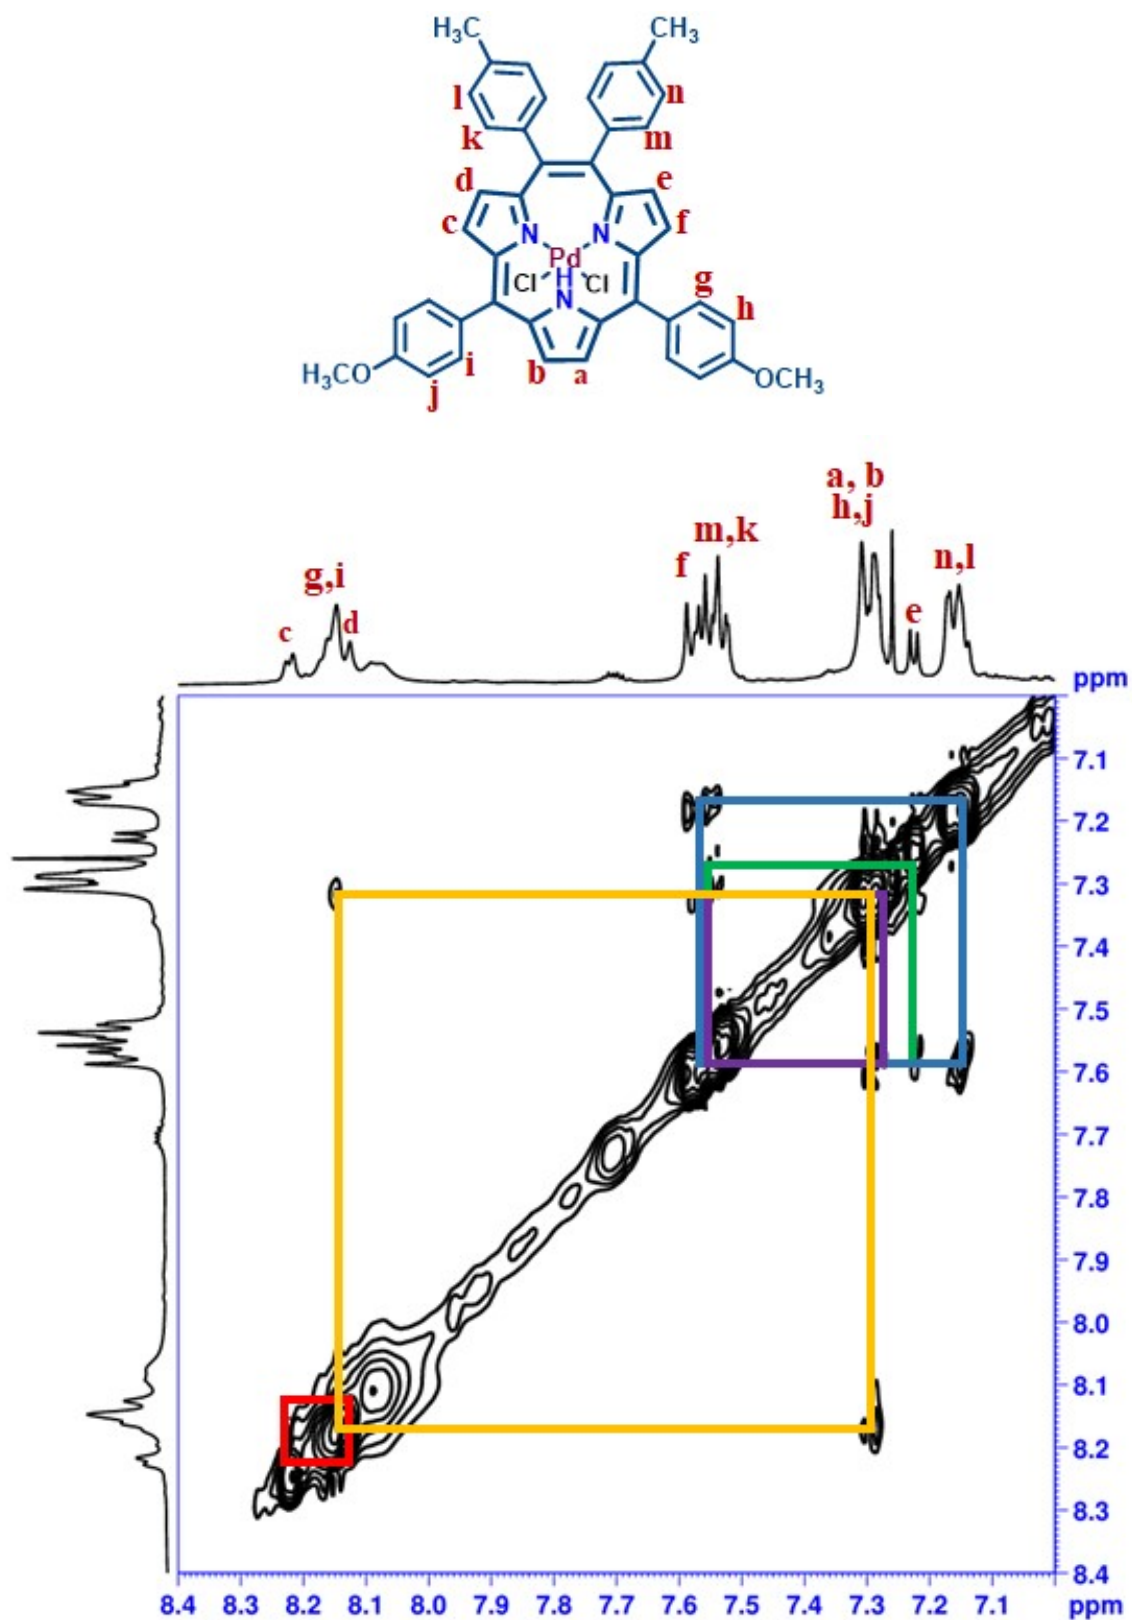

**Figure S13.** Partial  $^1\text{H}$ - $^1\text{H}$  COSY spectrum of compound **1c.Pd(II)** recorded in  $\text{CDCl}_3$  at room temperature on 400 MHz instrument.

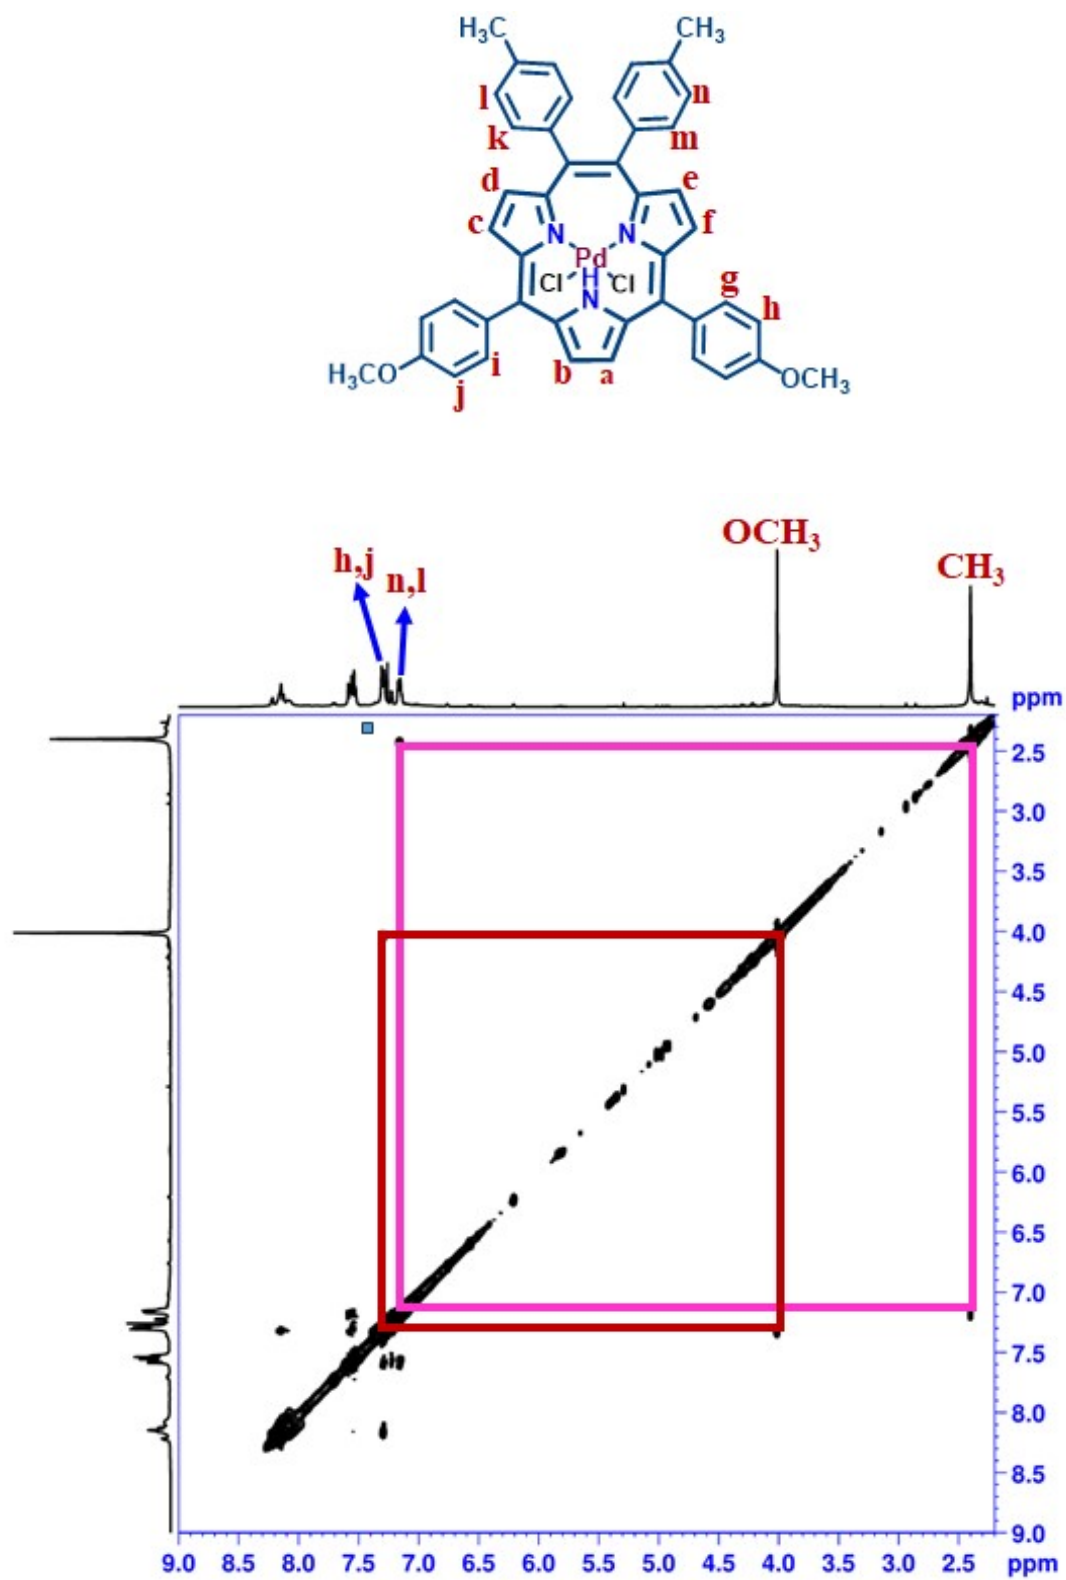

**Figure S14.**  $^1\text{H}$ - $^1\text{H}$  NOESY spectrum of compound **1c.Pd(II)** recorded in  $\text{CDCl}_3$  at room temperature on 400 MHz instrument.

**Table S1.** Crystal data and data collection parameters for compound **1b.Pd(II)**.

---

|                                             |                                                                   |
|---------------------------------------------|-------------------------------------------------------------------|
| Empirical formula                           | C <sub>44</sub> H <sub>35</sub> Cl <sub>2</sub> N <sub>3</sub> Pd |
| Formula weight                              | 783.109                                                           |
| Temperature/K                               | 150.15                                                            |
| Crystal system                              | monoclinic                                                        |
| Space group                                 | P2 <sub>1</sub> /m                                                |
| a/Å                                         | 8.6766(4)                                                         |
| b/Å                                         | 25.1706(8)                                                        |
| c/Å                                         | 9.7595(3)                                                         |
| α/°                                         | 90                                                                |
| β/°                                         | 91.352(3)                                                         |
| γ/°                                         | 90                                                                |
| Volume/Å <sup>3</sup>                       | 2130.83(14)                                                       |
| Z                                           | 2                                                                 |
| ρ <sub>calc</sub> /cm <sup>3</sup>          | 1.221                                                             |
| μ/mm <sup>-1</sup>                          | 0.592                                                             |
| F(000)                                      | 799.0                                                             |
| Crystal size/mm <sup>3</sup>                | 0.1 × 0.05 × 0.01                                                 |
| Radiation                                   | Mo Kα (λ = 0.71073)                                               |
| 2Θ range for data collection/°              | 4.18 to 50                                                        |
| Index ranges                                | -9 ≤ h ≤ 12, -35 ≤ k ≤ 36, -13 ≤ l ≤ 13                           |
| Reflections collected                       | 43347                                                             |
| Independent reflections                     | 3850 [R <sub>int</sub> = 0.1273, R <sub>sigma</sub> = 0.0939]     |
| Data/restraints/parameters                  | 3850/0/231                                                        |
| Goodness-of-fit on F <sup>2</sup>           | 1.050                                                             |
| Final R indexes [I ≥ 2σ (I)]                | R <sub>1</sub> = 0.0806, wR <sub>2</sub> = 0.2030                 |
| Final R indexes [all data]                  | R <sub>1</sub> = 0.0905, wR <sub>2</sub> = 0.2120                 |
| Largest diff. peak/hole / e Å <sup>-3</sup> | 2.43/-1.10                                                        |

---

**Table S2.** Selected bond lengths for compound **1b.Pd(II)**.

| Atom | Atom              | Length/Å | Atom | Atom              | Length/Å  |
|------|-------------------|----------|------|-------------------|-----------|
| Pd00 | C11 <sup>1</sup>  | 2.299(2) | C00A | C00F              | 1.348(9)  |
| Pd00 | C11               | 2.299(2) | C00B | C00B <sup>1</sup> | 1.365(12) |
| Pd00 | N005 <sup>1</sup> | 2.027(5) | C00C | C00C <sup>1</sup> | 1.383(12) |
| Pd00 | N005              | 2.027(5) | C00D | C00F              | 1.452(8)  |
| N003 | C007 <sup>1</sup> | 1.368(7) | C00E | C00H              | 1.390(9)  |
| N003 | C007              | 1.368(7) | C00E | C00I              | 1.391(9)  |
| N005 | C006              | 1.343(7) | C00G | C00M              | 1.373(9)  |
| N005 | C00D              | 1.374(7) | C00G | C00N              | 1.371(9)  |
| C006 | C00A              | 1.440(9) | C00G | C00Q              | 1.514(9)  |
| C006 | C00C              | 1.453(8) | C00H | C00O              | 1.387(10) |
| C007 | C009              | 1.433(8) | C00I | C00K              | 1.391(9)  |
| C007 | C00B              | 1.395(8) | C00J | C00M              | 1.381(9)  |
| C008 | C00C              | 1.482(8) | C00K | C00L              | 1.386(11) |
| C008 | C00J              | 1.374(9) | C00L | C00O              | 1.392(11) |
| C008 | C00R              | 1.404(9) | C00L | C00S              | 1.502(10) |
| C009 | C00D              | 1.386(8) | C00N | C00R              | 1.366(9)  |
| C009 | C00E              | 1.463(8) |      |                   |           |

**Table S3.** Selected bond angles for compound **1b.Pd(II)**.

| Atom              | Atom | Atom              | Angle/°    | Atom              | Atom | Atom | Angle/°  |
|-------------------|------|-------------------|------------|-------------------|------|------|----------|
| C11 <sup>1</sup>  | Pd00 | C11               | 94.39(12)  | C008              | C00C | C006 | 112.8(5) |
| N005              | Pd00 | C11               | 175.30(14) | C00C <sup>1</sup> | C00C | C006 | 128.5(3) |
| N005 <sup>1</sup> | Pd00 | C11               | 89.83(14)  | C00C <sup>1</sup> | C00C | C008 | 118.5(3) |
| N005 <sup>1</sup> | Pd00 | C11 <sup>1</sup>  | 175.30(14) | C009              | C00D | N005 | 123.7(5) |
| N005              | Pd00 | C11 <sup>1</sup>  | 89.83(14)  | C00F              | C00D | N005 | 106.7(5) |
| N005              | Pd00 | N005 <sup>1</sup> | 85.9(2)    | C00F              | C00D | C009 | 129.3(5) |
| C007              | N003 | C007 <sup>1</sup> | 109.3(7)   | C00H              | C00E | C009 | 121.2(6) |
| C006              | N005 | Pd00 <sup>1</sup> | 119.4(4)   | C00I              | C00E | C009 | 120.4(6) |
| C00D              | N005 | Pd00 <sup>1</sup> | 128.6(4)   | C00I              | C00E | C00H | 118.3(6) |
| C00D              | N005 | C006              | 109.6(5)   | C00D              | C00F | C00A | 107.5(5) |
| C00A              | C006 | N005              | 108.2(5)   | C00N              | C00G | C00M | 117.8(6) |
| C00C              | C006 | N005              | 127.1(6)   | C00Q              | C00G | C00M | 120.3(6) |
| C00C              | C006 | C00A              | 124.8(5)   | C00Q              | C00G | C00N | 121.9(6) |
| C009              | C007 | N003 <sup>1</sup> | 119.1(5)   | C00O              | C00H | C00E | 120.2(7) |
| C00B              | C007 | N003 <sup>1</sup> | 107.1(5)   | C00K              | C00I | C00E | 121.4(6) |
| C00B              | C007 | C009              | 133.0(6)   | C00M              | C00J | C008 | 120.6(6) |
| C00J              | C008 | C00C              | 120.4(5)   | C00L              | C00K | C00I | 120.4(7) |
| C00R              | C008 | C00C              | 122.2(6)   | C00O              | C00L | C00K | 118.1(6) |
| C00R              | C008 | C00J              | 117.2(6)   | C00S              | C00L | C00K | 120.7(8) |
| C00D              | C009 | C007              | 118.6(5)   | C00S              | C00L | C00O | 121.2(8) |
| C00E              | C009 | C007              | 118.8(5)   | C00J              | C00M | C00G | 121.9(6) |
| C00E              | C009 | C00D              | 122.6(5)   | C00R              | C00N | C00G | 121.3(6) |
| C00F              | C00A | C006              | 107.7(5)   | C00L              | C00O | C00H | 121.7(7) |
| C00B <sup>1</sup> | C00B | C007              | 108.1(4)   | C00N              | C00R | C008 | 121.2(6) |

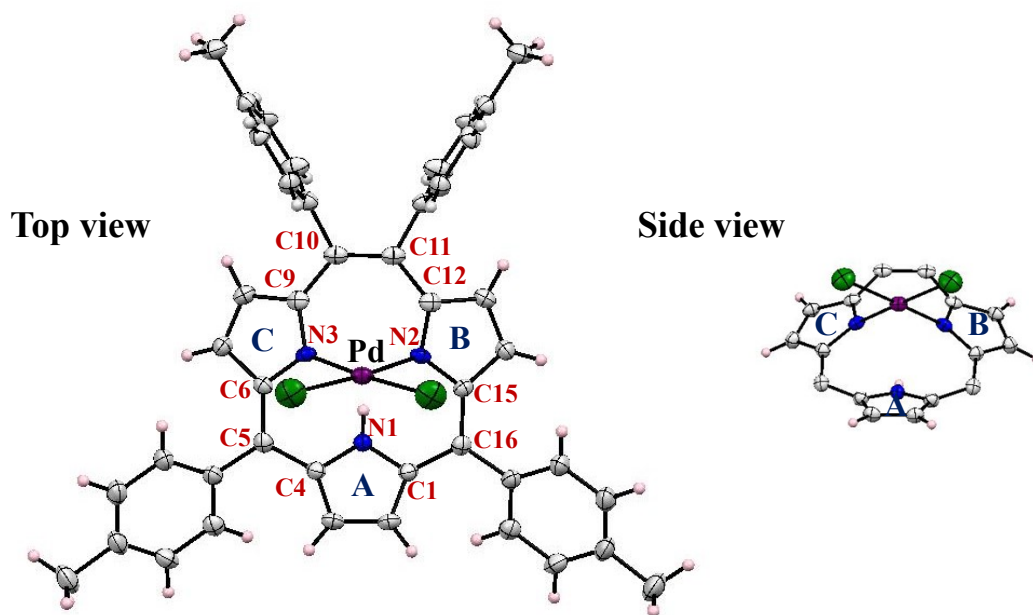

**Figure S15.** The ORTEP diagram of compound **1b.Pd(II)** at 50% probability level. (a) Top view; (b) Side view. The *meso*-aryl substituents in side view are omitted for clarity.

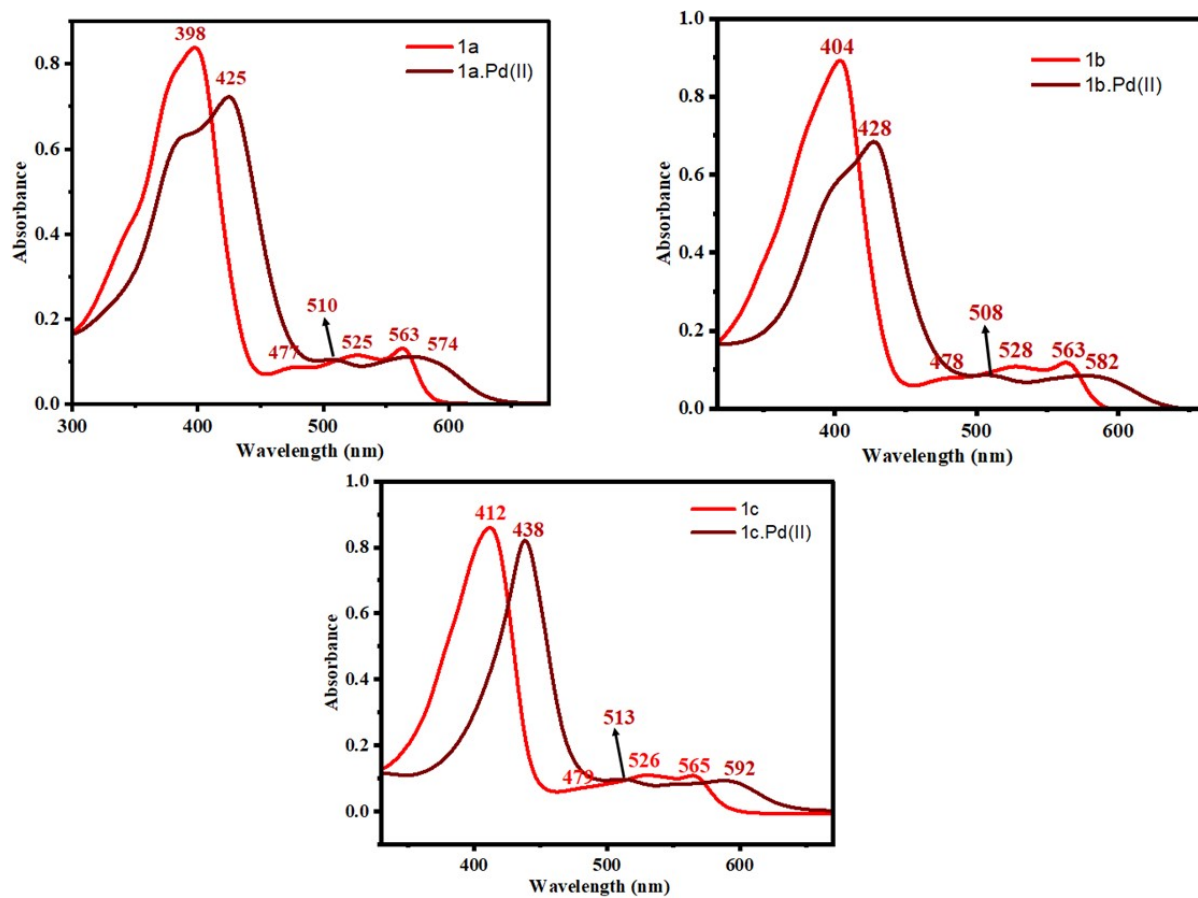

**Figure S16.** Absorption spectra of compounds **1a-c** and **1a.Pd(II)-1c.Pd(II)** ( $10^{-5}$  M) recorded in chloroform at rt.

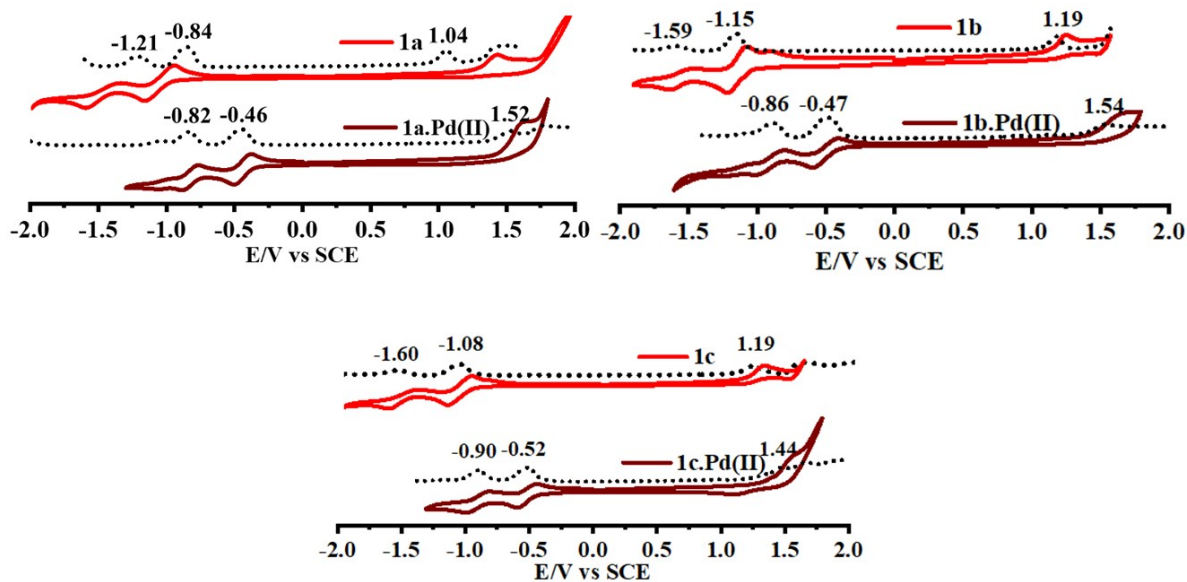

**Figure S17.** Comparison of cyclic voltammograms (red and brown coloured solid line) with their differential pulse voltammogram (dotted black line) of compounds **1a-c** and **1a.Pd(II)-1c.Pd(II)** recorded in dry  $\text{CH}_2\text{Cl}_2$  with 0.1 M TBAP as the supporting electrolyte and a saturated calomel electrode (SCE) as the reference electrode at a scan rate of  $50 \text{ mVs}^{-1}$ . A saturated calomel electrode (SCE) was employed as the reference electrode, glassy carbon as the working electrode, and platinum wire as the auxiliary electrode. (Note that polarographic convention has been followed for plotting CV starting at 0 V). All the potentials were calibrated using ferrocene as an external standard, taking  $E_{1/2}(\text{Fc}/\text{Fc}^+) = 0.42 \text{ V}$  versus SCE.

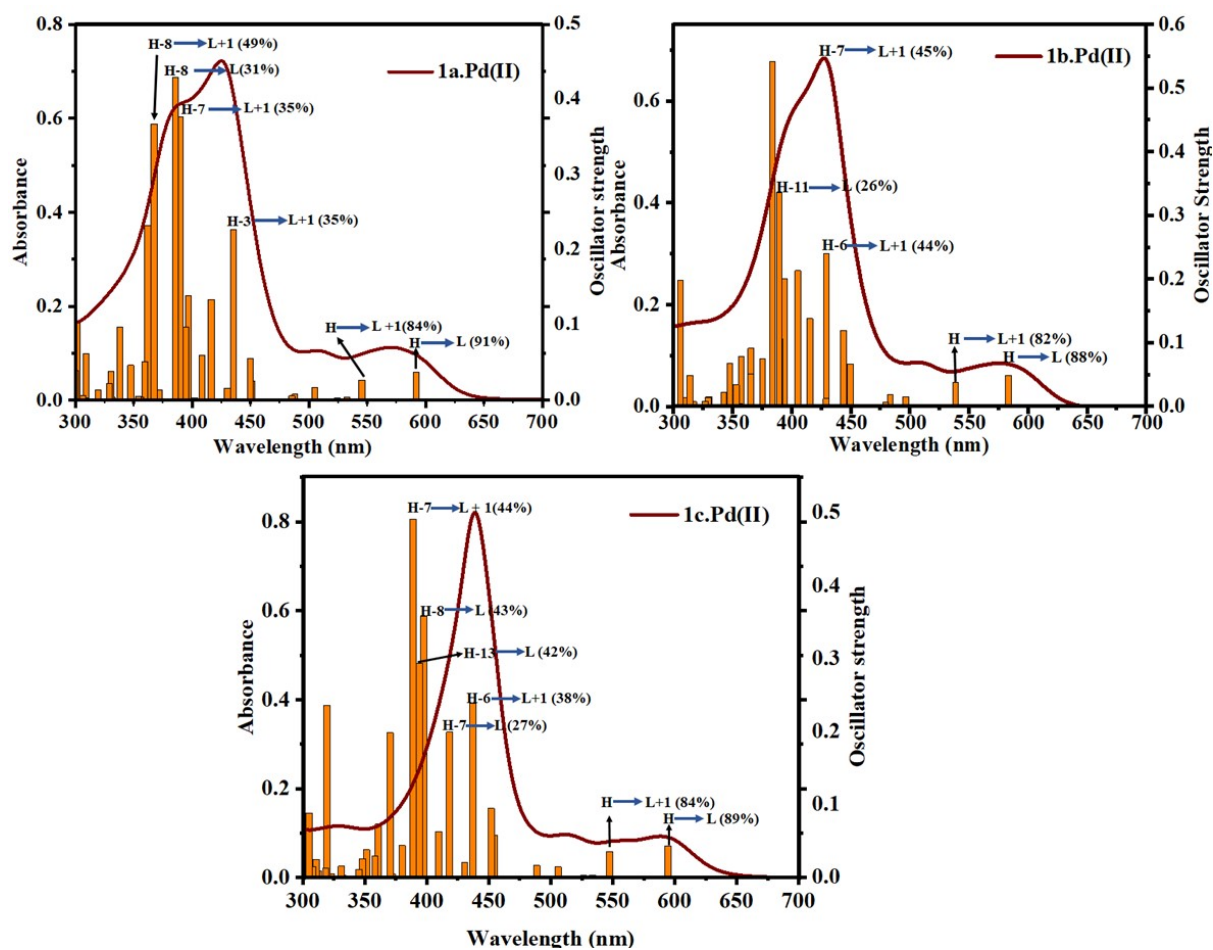

**Figure S18.** Calculated excitations (orange vertical lines) and experimental absorption spectrum (brown line) for compounds **1a.Pd(II)**-**1c.Pd(II)** .

**Table S4.** S<sub>0</sub> optimized geometry of dyad **1a.Pd(II)** at B3LYP/6-31G (d,p) and LANL2DZ level of theory.

# Sum of imaginary frequencies= 0

# Total Energy (Hartree) = -2830.220176

| Atom | X        | Y        | Z        | Atom | X        | Y        | Z        |
|------|----------|----------|----------|------|----------|----------|----------|
| Pd   | 1.262433 | -0.61143 | 0        | H    | -2.36453 | 3.860797 | -1.45    |
| Cl   | 2.790045 | -0.93789 | 1.686682 | N    | -0.17091 | -0.22948 | 1.380607 |
| N    | -0.92112 | -2.40379 | 0        | C    | -0.55941 | 1.038239 | 1.595816 |
| H    | -1.40034 | -1.66605 | 0        | C    | -0.4905  | -3.06714 | 1.115058 |
| N    | -0.17091 | -0.22948 | -1.38061 | C    | -0.35892 | 3.465797 | 1.399485 |
| C    | -0.55941 | 1.038239 | -1.59582 | C    | -0.56024 | -2.4101  | 2.38869  |
| C    | -0.4905  | -3.06714 | -1.11506 | C    | -1.16036 | 1.107155 | 2.90217  |
| C    | -0.35892 | 3.465797 | -1.39949 | H    | -1.485   | 1.891173 | 3.329189 |
| C    | -0.56024 | -2.4101  | -2.38869 | C    | 0.138877 | -4.23456 | 0.682123 |
| C    | -1.16036 | 1.107155 | -2.90217 | H    | 0.503843 | -4.9116  | 1.240206 |
| H    | -1.485   | 1.891173 | -3.32919 | C    | -0.41137 | 2.164758 | 0.692192 |
| C    | 0.138877 | -4.23456 | -0.68212 | C    | -0.5961  | -1.02525 | 2.416378 |
| H    | 0.503843 | -4.9116  | -1.24021 | C    | -0.62924 | -3.22485 | 3.601913 |
| C    | -0.41137 | 2.164758 | -0.69219 | C    | -1.17964 | -0.14189 | 3.410616 |
| C    | -0.5961  | -1.02525 | -2.41638 | H    | -1.51426 | -0.39644 | 4.262289 |
| C    | -0.62924 | -3.22485 | -3.60191 | C    | -0.24923 | 5.837921 | 2.892102 |
| C    | -1.17964 | -0.14189 | -3.41062 | C    | -0.02534 | -2.81082 | 4.782414 |
| H    | -1.51426 | -0.39644 | -4.26229 | H    | 0.407082 | -1.96578 | 4.821705 |
| C    | -0.24923 | 5.837921 | -2.8921  | C    | -1.23464 | -4.47761 | 3.574225 |

|   |          |          |          |    |          |          |          |
|---|----------|----------|----------|----|----------|----------|----------|
| C | -0.02534 | -2.81082 | -4.78241 | H  | -1.64642 | -4.77803 | 2.77229  |
| H | 0.407082 | -1.96578 | -4.82171 | C  | 0.844311 | 3.981959 | 1.817317 |
| C | -1.23464 | -4.47761 | -3.57423 | H  | 1.650649 | 3.523757 | 1.612278 |
| H | -1.64642 | -4.77803 | -2.77229 | C  | -1.25018 | -5.29768 | 4.696834 |
| C | 0.844311 | 3.981959 | -1.81732 | H  | -1.6725  | -6.14802 | 4.655252 |
| H | 1.650649 | 3.523757 | -1.61228 | C  | -0.65313 | -4.88299 | 5.877335 |
| C | -1.25018 | -5.29768 | -4.69683 | C  | 0.88998  | 5.160732 | 2.537196 |
| H | -1.6725  | -6.14802 | -4.65525 | H  | 1.735081 | 5.512613 | 2.792426 |
| C | -0.65313 | -4.88299 | -5.87734 | C  | -1.45118 | 5.328313 | 2.476787 |
| C | 0.88998  | 5.160732 | -2.5372  | H  | -2.25431 | 5.781189 | 2.707652 |
| H | 1.735081 | 5.512613 | -2.79243 | C  | -0.05249 | -3.62682 | 5.902506 |
| C | -1.45118 | 5.328313 | -2.47679 | H  | 0.349362 | -3.32173 | 6.707512 |
| H | -2.25431 | 5.781189 | -2.70765 | C  | -0.15748 | 7.12138  | 3.69001  |
| C | -0.05249 | -3.62682 | -5.90251 | H  | 0.069057 | 7.863018 | 3.089666 |
| H | 0.349362 | -3.32173 | -6.70751 | H  | -1.01978 | 7.301608 | 4.11937  |
| C | -0.15748 | 7.12138  | -3.69001 | H  | 0.536859 | 7.031938 | 4.374776 |
| H | 0.069057 | 7.863018 | -3.08967 | C  | -1.51832 | 4.181008 | 1.739288 |
| H | -1.01978 | 7.301608 | -4.11937 | H  | -2.36453 | 3.860797 | 1.450003 |
| H | 0.536859 | 7.031938 | -4.37478 | Cl | 2.790045 | -0.93789 | -1.68668 |
| C | -1.51832 | 4.181008 | -1.73929 | H  | -0.65381 | -5.51014 | 6.744276 |
| H | -0.65381 | -5.51014 | -6.74428 |    |          |          |          |

---

**Table S5 .**  $S_0$  optimized geometry of dyad **1b.Pd(II)** at B3LYP/6-31G (d,p) and LANL2DZ level of theory.

# Sum of imaginary frequencies= 0

# Total Energy (Hartree) = -2908.800054

| Atom | X        | Y        | Z        | Atom | X        | Y        | Z        |
|------|----------|----------|----------|------|----------|----------|----------|
| Pd   | -1.29151 | -0.36072 | 0        | H    | 0.578792 | -5.01057 | 7.895967 |
| Cl   | -2.82285 | -0.66924 | -1.68668 | H    | 1.299372 | -6.16635 | 7.055697 |
| N    | 0.870873 | -2.17856 | 0        | N    | 0.146207 | 0.004406 | -1.38061 |
| H    | 1.358717 | -1.44649 | 0        | C    | 0.549552 | 1.26748  | -1.59582 |
| N    | 0.146207 | 0.004406 | 1.380607 | C    | 0.43251  | -2.83681 | -1.11506 |
| C    | 0.549552 | 1.26748  | 1.595816 | C    | 0.377536 | 3.697221 | -1.39949 |
| C    | 0.43251  | -2.83681 | 1.115058 | C    | 0.50995  | -2.18064 | -2.38869 |
| C    | 0.377536 | 3.697221 | 1.399485 | C    | 1.151266 | 1.329345 | -2.90217 |
| C    | 0.50995  | -2.18064 | 2.38869  | H    | 1.485072 | 2.109503 | -3.32919 |
| C    | 1.151266 | 1.329345 | 2.90217  | C    | -0.21051 | -3.99677 | -0.68212 |
| H    | 1.485072 | 2.109503 | 3.329189 | H    | -0.58339 | -4.66948 | -1.24021 |
| C    | -0.21051 | -3.99677 | 0.682123 | C    | 0.41473  | 2.395657 | -0.69219 |
| H    | -0.58339 | -4.66948 | 1.240206 | C    | 0.562042 | -0.7963  | -2.41638 |
| C    | 0.41473  | 2.395657 | 0.692192 | C    | 0.56939  | -2.99614 | -3.60191 |
| C    | 0.562042 | -0.7963  | 2.416378 | C    | 1.155895 | 0.080165 | -3.41062 |
| C    | 0.56939  | -2.99614 | 3.601913 | H    | 1.487515 | -0.1783  | -4.26229 |
| C    | 1.155895 | 0.080165 | 3.410616 | C    | 0.295664 | 6.070468 | -2.8921  |
| H    | 1.487515 | -0.1783  | 4.262289 | C    | -0.02961 | -2.57505 | -4.78241 |
| C    | 0.295664 | 6.070468 | 2.892102 | H    | -0.4521  | -1.725   | -4.82171 |
| C    | -0.02961 | -2.57505 | 4.782414 | C    | 1.160059 | -4.25591 | -3.57423 |

|    |          |          |          |   |          |          |          |
|----|----------|----------|----------|---|----------|----------|----------|
| H  | -0.4521  | -1.725   | 4.821705 | H | 1.568287 | -4.56114 | -2.77229 |
| C  | 1.160059 | -4.25591 | 3.574225 | C | -0.81956 | 4.227456 | -1.81732 |
| H  | 1.568287 | -4.56114 | 2.77229  | H | -1.63122 | 3.778739 | -1.61228 |
| C  | -0.81956 | 4.227456 | 1.817317 | C | 1.165985 | -5.0761  | -4.69683 |
| H  | -1.63122 | 3.778739 | 1.612278 | H | 1.578308 | -5.93133 | -4.65525 |
| C  | 1.165985 | -5.0761  | 4.696834 | C | 0.573839 | -4.65444 | -5.87734 |
| H  | 1.578308 | -5.93133 | 4.655252 | C | -0.85141 | 5.406683 | -2.5372  |
| C  | 0.573839 | -4.65444 | 5.877335 | H | -1.69232 | 5.768448 | -2.79243 |
| C  | -0.85141 | 5.406683 | 2.537196 | C | 1.491554 | 5.546803 | -2.47679 |
| H  | -1.69232 | 5.768448 | 2.792426 | H | 2.299945 | 5.990231 | -2.70765 |
| C  | 1.491554 | 5.546803 | 2.476787 | C | -0.01204 | -3.39131 | -5.90251 |
| H  | 2.299945 | 5.990231 | 2.707652 | H | -0.41028 | -3.08154 | -6.70751 |
| C  | -0.01204 | -3.39131 | 5.902506 | C | 0.218966 | 7.354915 | -3.69001 |
| H  | -0.41028 | -3.08154 | 6.707512 | H | 0.001143 | 8.099158 | -3.08967 |
| C  | 0.218966 | 7.354915 | 3.69001  | H | 1.083325 | 7.52502  | -4.11937 |
| H  | 0.001143 | 8.099158 | 3.089666 | H | -0.47637 | 7.27362  | -4.37478 |
| H  | 1.083325 | 7.52502  | 4.11937  | C | 1.545237 | 4.39879  | -1.73929 |
| H  | -0.47637 | 7.27362  | 4.374776 | H | 2.387641 | 4.068679 | -1.45    |
| C  | 1.545237 | 4.39879  | 1.739288 | C | 0.535026 | -5.55371 | -7.08049 |
| H  | 2.387641 | 4.068679 | 1.450003 | H | -0.29789 | -6.06961 | -7.07687 |
| C  | 0.535026 | -5.55371 | 7.08049  | H | 0.578792 | -5.01057 | -7.89597 |
| H  | -0.29789 | -6.06961 | 7.076865 | H | 1.299372 | -6.16635 | -7.0557  |
| Cl | -2.82285 | -0.66924 | 1.686682 |   |          |          |          |

---

**Table S6.** S<sub>0</sub> optimized geometry of dyad **1c.Pd(II)** at B3LYP/6-31G (d,p) and LANL2DZ level of theory.

# Sum of imaginary frequencies= 0

# Total Energy (Hartree) = -3059.253070

| Atom | X        | Y        | Z        | Atom | X        | Y        | Z        |
|------|----------|----------|----------|------|----------|----------|----------|
| Pd   | -0.10078 | -0.00042 | 1.38118  | C    | 3.895825 | 1.39279  | -0.43466 |
| Cl   | -0.35067 | 1.686689 | 2.922698 | C    | -1.9814  | 2.391159 | -0.35283 |
| N    | -1.9962  | 0.00248  | -0.71353 | C    | 1.503674 | 2.899189 | -1.12163 |
| H    | -1.28239 | 0.001355 | -1.22773 | H    | 2.271816 | 3.325002 | -1.48365 |
| N    | 0.209563 | -1.38155 | -0.06885 | C    | -3.77274 | 0.687401 | 0.433371 |
| C    | 1.456765 | -1.59872 | -0.51795 | H    | -4.43055 | 1.24652  | 0.830501 |
| C    | -2.63978 | -1.11157 | -0.25145 | C    | 2.59267  | 0.687528 | -0.42438 |
| C    | 3.891463 | -1.40618 | -0.43459 | C    | -0.59985 | 2.416691 | -0.45533 |
| C    | -1.98885 | -2.38622 | -0.35271 | C    | -2.79664 | 3.605653 | -0.38255 |
| C    | 1.494627 | -2.90514 | -1.12149 | C    | 0.255949 | 3.409581 | -1.08075 |
| H    | 2.261438 | -3.33337 | -1.48349 | H    | -0.0131  | 4.261666 | -1.40275 |
| C    | -3.77486 | -0.67684 | 0.433405 | C    | 6.272803 | 2.881704 | -0.43935 |
| H    | -4.43441 | -1.23389 | 0.830562 | C    | -2.35216 | 4.785477 | 0.200683 |
| C    | 2.590512 | -0.69686 | -0.42435 | H    | -1.48723 | 4.82343  | 0.591917 |
| C    | -0.60738 | -2.41606 | -0.45521 | C    | -4.07713 | 3.579947 | -0.92692 |
| C    | -2.80787 | -3.59816 | -0.38237 | H    | -4.39829 | 2.778502 | -1.32374 |
| C    | 0.245317 | -3.41164 | -1.08058 | C    | 4.469978 | 1.809757 | 0.742318 |
| H    | -0.02638 | -4.2629  | -1.40254 | H    | 4.050815 | 1.605392 | 1.569789 |
| C    | 6.263788 | -2.90249 | -0.43921 | C    | -4.89525 | 4.703833 | -0.90298 |
| C    | -2.36707 | -4.77934 | 0.200919 | H    | -5.765   | 4.663598 | -1.28387 |

|   |          |          |          |    |          |          |          |
|---|----------|----------|----------|----|----------|----------|----------|
| H | -1.50226 | -4.81997 | 0.592155 | C  | -4.45046 | 5.883657 | -0.32663 |
| C | -4.08828 | -3.56849 | -0.92674 | C  | 5.650703 | 2.527796 | 0.731156 |
| H | -4.40693 | -2.76607 | -1.3236  | H  | 6.043266 | 2.782435 | 1.558326 |
| C | 4.464313 | -1.82487 | 0.742407 | C  | 5.705264 | 2.467244 | -1.61535 |
| H | 4.045789 | -1.61916 | 1.569868 | H  | 6.119301 | 2.697444 | -2.43937 |
| C | -4.90989 | -4.68982 | -0.90275 | C  | -3.16678 | 5.90684  | 0.212836 |
| H | -5.77951 | -4.6469  | -1.28364 | H  | -2.84144 | 6.71135  | 0.599509 |
| C | -4.46878 | -5.871   | -0.32633 | C  | 7.560434 | 3.677607 | -0.40952 |
| C | 5.642794 | -2.54659 | 0.731281 | H  | 8.311183 | 3.076097 | -0.21895 |
| H | 6.034562 | -2.80241 | 1.558464 | H  | 7.6996   | 4.106729 | -1.27952 |
| C | 5.697543 | -2.48632 | -1.61523 | H  | 7.505597 | 4.362477 | 0.288297 |
| H | 6.110861 | -2.71785 | -2.43924 | C  | 4.554909 | 1.731537 | -1.62715 |
| C | -3.18518 | -5.89816 | 0.213128 | H  | 4.193872 | 1.442794 | -2.45696 |
| H | -2.86235 | -6.70366 | 0.59984  | Cl | -0.35593 | -1.68667 | 2.922781 |
| C | 7.548932 | -3.7024  | -0.40934 | O  | -5.3078  | -7.02831 | -0.28685 |
| H | 8.301552 | -3.10323 | -0.2188  | O  | -5.28587 | 7.043584 | -0.2872  |
| H | 7.686759 | -4.132   | -1.27931 | C  | -5.45799 | -7.55432 | -1.60808 |
| H | 7.49196  | -4.38707 | 0.288513 | H  | -5.93868 | -8.50903 | -1.55938 |
| C | 4.549488 | -1.74704 | -1.62707 | H  | -6.05326 | -6.88471 | -2.19303 |
| H | 4.189352 | -1.45721 | -2.45689 | H  | -4.4944  | -7.66283 | -2.06045 |
| N | 0.213867 | 1.37966  | -0.06892 | C  | -5.3978  | 7.596124 | -1.60138 |
| C | 1.461739 | 1.592913 | -0.51803 | H  | -5.96545 | 6.932824 | -2.22001 |
| C | -2.6363  | 1.118548 | -0.2515  | H  | -5.89077 | 8.544342 | -1.54882 |
| H | -4.42093 | 7.724646 | -2.01864 |    |          |          |          |

**Table S7.** Selected TD-DFT calculated oscillator strengths and compositions of the major electronic transitions of **1a.Pd(II)**.

| Wavelength (nm) | Oscillator Strength | Major contribution                                               |
|-----------------|---------------------|------------------------------------------------------------------|
| 592.120889308   | 0.0365              | HOMO->LUMO (91%)                                                 |
| 585.493922423   | 0.0002              | H-1->LUMO (98%)                                                  |
| 570.409426814   | 0.0005              | H-2->LUMO (96%)                                                  |
| 545.48899209    | 0.0255              | HOMO->L+1 (84%)                                                  |
| 538.616764465   | 0.0002              | H-1->L+1 (89%)                                                   |
| 532.898620357   | 0.0027              | H-2->L+1 (89%)                                                   |
| 524.600968995   | 0.0021              | H-4->LUMO (88%)                                                  |
| 505.088984447   | 0.0163              | H-4->L+1 (12%), H-3->LUMO (68%)                                  |
| 488.030675112   | 0.0067              | H-4->L+1 (83%)                                                   |
| 485.43202307    | 0.0045              | H-6->LUMO (49%), H-3->L+1 (46%)                                  |
| 483.991853114   | 0.001               | H-5->LUMO (87%)                                                  |
| 451.015616632   | 0.0244              | H-7->LUMO (46%), H-6->L+1 (42%)                                  |
| 449.674281925   | 0.0541              | H-7->L+1 (11%), H-6->LUMO (15%), H-5->L+1 (66%)                  |
| 435.536561676   | 0.2253              | H-7->L+1 (15%), H-6->LUMO (15%), H-5->L+1 (29%), H-3->L+1 (35%)  |
| 430.38111987    | 0.0147              | H-2->L+2 (14%), HOMO->L+2 (60%)                                  |
| 416.529574052   | 0.1327              | H-7->LUMO (17%), H-6->L+1 (20%), H-2->L+2 (34%), HOMO->L+2 (12%) |
| 408.51463925    | 0.0587              | H-8->LUMO (42%), H-7->LUMO (13%), H-2->L+2 (32%)                 |
| 406.46557064    | 0.0001              | H-1->L+2 (88%)                                                   |
| 402.337074936   | 0.0015              | H-9->LUMO (88%)                                                  |
| 396.724027301   | 0.1379              | H-13->LUMO (16%), H-11->LUMO (51%), H-8->LUMO (17%)              |
| 394.414483894   | 0.0962              | H-12->LUMO (36%), H-10->LUMO (22%), H-7->L+1 (25%)               |
| 389.495454298   | 0.3757              | H-11->LUMO (25%), H-8->LUMO (31%), H-6->L+1 (15%)                |
| 385.64290206    | 0.4281              | H-10->LUMO (26%), H-8->L+1 (20%), H-7->L+1 (35%)                 |
| 382.939101869   | 0.0013              | H-4->L+2 (86%)                                                   |
| 374.088625086   | 0.0002              | H-9->L+1 (97%)                                                   |

|               |        |                                                    |
|---------------|--------|----------------------------------------------------|
| 371.655254833 | 0.0124 | H-12->LUMO (30%), H-10->LUMO (42%), H-8->L+1 (26%) |
| 367.502128263 | 0.366  | H-12->LUMO (22%), H-8->L+1 (49%)                   |
| 361.902545352 | 0.2305 | H-13->LUMO (71%), H-11->LUMO (19%)                 |
| 359.73942554  | 0.0496 | H-12->L+1 (36%), H-10->L+1 (51%)                   |
| 357.725823054 | 0.001  | H-14->LUMO (76%), H-11->L+1 (14%)                  |
| 355.591800305 | 0.0032 | H-15->LUMO (86%), H-14->L+1 (11%)                  |
| 354.068575298 | 0.0039 | H-14->LUMO (14%), H-13->L+1 (10%), H-11->L+1 (67%) |
| 347.479591413 | 0.0452 | H-12->L+1 (56%), H-10->L+1 (42%)                   |
| 337.951298859 | 0.0958 | H-13->L+1 (81%), H-11->L+1 (13%)                   |
| 331.712531804 | 0.0011 | H-16->LUMO (72%), H-15->L+1 (13%)                  |
| 331.650419998 | 0.0026 | H-15->LUMO (10%), H-14->L+1 (86%)                  |
| 330.562809641 | 0.0376 | H-5->L+2 (42%), H-3->L+2 (38%)                     |
| 329.272303108 | 0.0207 | H-16->LUMO (19%), H-15->L+1 (69%)                  |
| 319.703445017 | 0.0128 | H-16->L+1 (94%)                                    |
| 309.241496052 | 0.0607 | H-6->L+2 (78%), HOMO->L+2 (15%)                    |
| 308.641042076 | 0.0021 | H-7->L+2 (26%), H-5->L+2 (27%), H-3->L+2 (42%)     |
| 306.277495645 | 0.005  | H-18->LUMO (94%)                                   |
| 301.672043145 | 0.1017 | H-19->LUMO (22%), H-17->LUMO (71%)                 |
| 300.232935423 | 0.0382 | H-19->LUMO (76%), H-17->LUMO (19%)                 |
| 295.397391147 | 0.0012 | H-20->LUMO (97%)                                   |
| 292.222572387 | 0.0018 | H-18->L+1 (92%)                                    |
| 288.926624283 | 0.0029 | H-19->L+1 (24%), H-17->L+1 (63%)                   |
| 285.994171001 | 0.0149 | H-19->L+1 (70%), H-17->L+1 (16%)                   |
| 281.942451421 | 0.0024 | H-7->L+2 (65%), H-5->L+2 (23%)                     |
| 281.41130558  | 0.0067 | H-20->L+1 (95%)                                    |

---

**Table S8.** Selected TD-DFT calculated oscillator strengths and compositions of the major electronic transitions of **1b.Pd(II)**.

| <b>Wavelength<br/>(nm)</b> | <b>Oscillator<br/>Strength</b> | <b>Major contribution</b>                                           |
|----------------------------|--------------------------------|---------------------------------------------------------------------|
| 583.537407692              | 0.0482                         | HOMO->LUMO (88%)                                                    |
| 573.576022447              | 0.0001                         | H-1->LUMO (97%)                                                     |
| 560.735348977              | 0.0004                         | H-2->LUMO (96%)                                                     |
| 538.780605824              | 0.0382                         | HOMO->L+1 (82%)                                                     |
| 528.086689719              | 0.0003                         | H-1->L+1 (88%)                                                      |
| 524.467821541              | 0.0025                         | H-2->L+1 (88%)                                                      |
| 514.970065676              | 0.0027                         | H-4->LUMO (86%)                                                     |
| 496.771347913              | 0.0149                         | H-4->L+1 (13%), H-3->LUMO (67%)                                     |
| 483.425714556              | 0.0189                         | H-5->LUMO (58%), H-3->L+1 (36%)                                     |
| 479.6479284                | 0.0068                         | H-4->L+1 (81%)                                                      |
| 475.05342355               | 0.0                            | H-6->LUMO (86%)                                                     |
| 449.788474559              | 0.0666                         | H-7->LUMO (34%), H-5->L+1 (45%)                                     |
| 443.783352467              | 0.1192                         | H-7->L+1 (13%), H-6->L+1 (52%), H-5->LUMO (15%), H-3->L+1 (17%)     |
| 429.382486622              | 0.2405                         | H-6->L+1 (44%), H-3->L+1 (33%)                                      |
| 429.011048485              | 0.0118                         | H-5->L+2 (11%), H-2->L+2 (17%), HOMO->L+2 (53%)                     |
| 415.496625376              | 0.1377                         | H-7->LUMO (19%), H-5->L+1 (16%), H-2->L+2 (38%), HOMO->L+2 (13%)    |
| 405.30955545               | 0.2129                         | H-8->LUMO (21%), H-7->LUMO (27%), H-2->L+2 (30%)                    |
| 405.203585242              | 0.0001                         | H-1->L+2 (89%)                                                      |
| 395.660559779              | 0.0002                         | H-11->LUMO (13%), H-9->LUMO (75%)                                   |
| 393.650600115              | 0.2005                         | H-13->LUMO (42%), H-8->LUMO (45%)                                   |
| 389.58112494               | 0.1061                         | H-12->LUMO (22%), H-11->LUMO (26%), H-9->LUMO (21%), H-7->L+1 (23%) |
| 389.434284048              | 0.3354                         | H-13->LUMO (33%), H-10->LUMO (24%), H-8->LUMO (26%)                 |
| 383.780700217              | 0.5419                         | H-11->LUMO (22%), H-7->L+1 (45%)                                    |
| 382.007003365              | 0.0006                         | H-4->L+2 (86%)                                                      |
| 375.334341453              | 0.0747                         | H-13->LUMO (17%), H-10->LUMO (71%)                                  |
| 367.87286892               | 0.0                            | H-9->L+1 (96%)                                                      |
| 365.551767586              | 0.0911                         | H-12->LUMO (41%), H-11->LUMO (16%), H-8->L+1 (33%)                  |

|               |        |                                                                   |
|---------------|--------|-------------------------------------------------------------------|
| 365.32557314  | 0.0511 | H-12->LUMO (20%), H-11->LUMO (22%), H-8->L+1 (52%)                |
| 357.385544253 | 0.0778 | H-12->L+1 (34%), H-11->L+1 (59%)                                  |
| 356.030878165 | 0.0044 | H-14->LUMO (67%), H-13->L+1 (13%), H-10->L+1 (12%)                |
| 353.836167272 | 0.0    | H-15->LUMO (85%), H-14->L+1 (12%)                                 |
| 353.010059257 | 0.0335 | H-14->LUMO (22%), H-13->L+1 (18%), H-10->L+1 (51%)                |
| 347.742730163 | 0.0673 | H-13->L+1 (63%), H-10->L+1 (33%)                                  |
| 342.478849269 | 0.0219 | H-12->L+1 (63%), H-11->L+1 (36%)                                  |
| 329.903126529 | 0.0151 | H-16->LUMO (21%), H-6->L+2 (29%), H-3->L+2 (33%)                  |
| 329.429782687 | 0.0143 | H-16->LUMO (42%), H-15->L+1 (20%), H-6->L+2 (14%), H-3->L+2 (14%) |
| 329.281048023 | 0.0012 | H-15->LUMO (11%), H-14->L+1 (86%)                                 |
| 326.867715094 | 0.0076 | H-16->LUMO (24%), H-15->L+1 (62%)                                 |
| 317.05457873  | 0.0073 | H-17->L+1 (13%), H-16->L+1 (82%)                                  |
| 313.995322424 | 0.0485 | H-5->L+2 (71%), HOMO->L+2 (22%)                                   |
| 309.210646712 | 0.0136 | H-17->LUMO (14%), H-7->L+2 (22%), H-6->L+2 (26%), H-3->L+2 (32%)  |
| 305.89211737  | 0.1976 | H-17->LUMO (65%)                                                  |
| 304.891658705 | 0.0034 | H-18->LUMO (96%)                                                  |
| 297.46687383  | 0.0015 | H-19->LUMO (96%)                                                  |
| 293.335682713 | 0.0219 | H-20->LUMO (31%), H-17->L+1 (53%)                                 |
| 292.133062398 | 0.0037 | H-20->LUMO (67%), H-17->L+1 (23%)                                 |
| 291.06320401  | 0.0043 | H-18->L+1 (91%)                                                   |
| 283.690721701 | 0.0108 | H-19->L+1 (91%)                                                   |
| 280.716808957 | 0.0023 | H-7->L+2 (67%), H-6->L+2 (23%)                                    |
| 278.7602424   | 0.0073 | H-20->L+1 (96%)                                                   |

---

**Table S9.** Selected TD-DFT calculated oscillator strengths and compositions of the major electronic transitions of **1c.Pd(II)**.

| Wavelength<br>(nm) | Oscillator<br>Strength | Major contribution                                               |
|--------------------|------------------------|------------------------------------------------------------------|
| 594.648407732      | 0.0426                 | HOMO->LUMO (89%)                                                 |
| 587.937182342      | 0.0002                 | H-1->LUMO (98%)                                                  |
| 572.199524701      | 0.0006                 | H-2->LUMO (96%)                                                  |
| 547.294928102      | 0.0349                 | HOMO->L+1 (84%)                                                  |
| 539.953806342      | 0.0002                 | H-1->L+1 (88%)                                                   |
| 533.678516754      | 0.0025                 | H-2->L+1 (88%)                                                   |
| 526.449802608      | 0.0021                 | H-4->LUMO (86%), H-1->L+1 (10%)                                  |
| 505.851460678      | 0.0142                 | H-4->L+1 (12%), H-3->LUMO (67%)                                  |
| 489.031645218      | 0.0061                 | H-4->L+1 (83%)                                                   |
| 488.607657191      | 0.0159                 | H-5->LUMO (54%), H-3->L+1 (39%)                                  |
| 484.976307499      | 0.0004                 | H-6->LUMO (84%)                                                  |
| 454.204465737      | 0.0575                 | H-7->LUMO (37%), H-5->L+1 (47%)                                  |
| 451.90331321       | 0.0941                 | H-7->L+1 (11%), H-6->L+1 (57%), H-5->LUMO (16%), H-3->L+1 (13%)  |
| 437.04111182       | 0.2384                 | H-7->L+1 (10%), H-6->L+1 (38%), H-5->LUMO (10%), H-3->L+1 (36%)  |
| 430.545518673      | 0.0198                 | H-2->L+2 (16%), HOMO->L+2 (56%)                                  |
| 418.187375244      | 0.1989                 | H-7->LUMO (27%), H-5->L+1 (20%), H-2->L+2 (22%), HOMO->L+2 (12%) |
| 409.418462544      | 0.062                  | H-8->LUMO (29%), H-7->LUMO (13%), H-2->L+2 (42%)                 |
| 406.839025471      | 0.0002                 | H-1->L+2 (88%)                                                   |
| 402.441550936      | 0.0017                 | H-9->LUMO (88%)                                                  |
| 397.46166895       | 0.3583                 | H-13->LUMO (35%), H-8->LUMO (43%)                                |
| 394.289053943      | 0.0942                 | H-12->LUMO (34%), H-11->LUMO (24%), H-7->L+1 (25%)               |
| 394.163703743      | 0.293                  | H-13->LUMO (42%), H-10->LUMO (30%), H-8->LUMO (14%)              |
| 388.689551107      | 0.4915                 | H-11->LUMO (20%), H-8->L+1 (11%), H-7->L+1 (44%)                 |
| 383.306105893      | 0.0007                 | H-4->L+2 (84%)                                                   |
| 380.133042103      | 0.0432                 | H-13->LUMO (18%), H-10->LUMO (65%)                               |
| 373.930672293      | 0.0002                 | H-9->L+1 (97%)                                                   |
| 372.000939159      | 0.0044                 | H-12->LUMO (47%), H-11->LUMO (50%)                               |

|               |        |                                                                     |
|---------------|--------|---------------------------------------------------------------------|
| 370.378470537 | 0.1981 | H-8->L+1 (80%)                                                      |
| 360.796743721 | 0.0726 | H-12->L+1 (44%), H-11->L+1 (49%)                                    |
| 358.056409773 | 0.0291 | H-13->L+1 (21%), H-10->L+1 (71%)                                    |
| 351.369361821 | 0.0373 | H-13->L+1 (74%), H-10->L+1 (22%)                                    |
| 347.967199944 | 0.0251 | H-12->L+1 (52%), H-11->L+1 (47%)                                    |
| 345.042698946 | 0.0108 | H-14->LUMO (87%)                                                    |
| 343.379934673 | 0.0008 | H-15->LUMO (86%), H-14->L+1 (12%)                                   |
| 332.192463125 | 0.002  | H-17->LUMO (68%), H-16->LUMO (28%)                                  |
| 330.977557427 | 0.0149 | H-6->L+2 (46%), H-3->L+2 (45%)                                      |
| 323.01850562  | 0.0048 | H-17->L+1 (34%), H-16->L+1 (13%), H-14->L+1 (44%)                   |
| 319.489249394 | 0.2355 | H-17->LUMO (28%), H-16->LUMO (54%)                                  |
| 318.43074022  | 0.0125 | H-15->L+1 (81%), H-14->LUMO (10%)                                   |
| 317.883734616 | 0.0    | H-17->L+1 (33%), H-16->L+1 (13%), H-14->L+1 (42%)                   |
| 312.72812645  | 0.0082 | H-20->LUMO (10%), H-18->LUMO (24%), H-17->L+1 (10%), H-5->L+2 (40%) |
| 310.60498788  | 0.024  | H-20->LUMO (22%), H-18->LUMO (32%), H-5->L+2 (31%)                  |
| 307.851698397 | 0.0146 | H-7->L+2 (24%), H-6->L+2 (27%), H-3->L+2 (43%)                      |
| 305.011668214 | 0.088  | H-20->LUMO (13%), H-17->L+1 (18%), H-16->L+1 (59%)                  |
| 301.181054784 | 0.0012 | H-21->LUMO (93%)                                                    |
| 298.18945384  | 0.0013 | H-20->L+1 (19%), H-19->LUMO (18%), H-18->L+1 (44%)                  |
| 296.996581738 | 0.0081 | H-22->LUMO (17%), H-20->LUMO (33%), H-18->LUMO (24%)                |
| 295.319993836 | 0.0014 | H-22->LUMO (80%)                                                    |
| 291.576579211 | 0.024  | H-20->L+1 (25%), H-19->LUMO (62%)                                   |
| 286.814548469 | 0.0085 | H-21->L+1 (93%)                                                     |

---

## References

1. K. N. Panda, K. G. Thorat, M. Ravikanth, *J. Org. Chem.*, 2018, **83**, 12945-12950.
2. L. J. Bourhis, O. V. Dolomanov, R. J. Gildea, J. A. K. Howard, H. Puschmann, *Acta Crystallogr. A Found. Adv.*, 2015, **71**, 59–75.
3. O. V. Dolomanov, L. J. Bourhis, R. J. Gildea, J. A. K. Howard, H. Puschmann, *J. Appl. Crystallogr.*, 2009, **42**, 339–341.
4. O. Treutler, R. Ahlrichs, *J. Chem. Phys.*, 1995, **102**, 346–354.
5. D. Becke, *J. Chem. Phys.*, 1993, **98**, 1372–1377.
6. F. Component, L. Radom, W. J. Hehre, J. A. Pople, *Orbital XIII*. 1971, **4064**, 2371–2381.
7. J. Tomasi, B. Mennucci, R. Cammi, *Chem. Rev.*, 2005, **105**, 2999–3093.
8. R. Bauernschmitt, R. Ahlrichs, *Chem. Phys. Lett.*, 1996, **256**, 454–464.
